# Supplementary material for: Risk of Cardiovascular Events and Lipid Profile Change in Patients with Breast Cancer Taking Aromatase Inhibitor: A Systematic Review and Meta-Analysis
Source: MDPI journal article supplement (doi:10.3390/curroncol30020142), 2023-02-02

# Supplementary Material

## Table of Contents

|                                                    |           |
|----------------------------------------------------|-----------|
| <b>I. Supplementary Materials and Methods.....</b> | <b>2</b>  |
| Search strategy and results                        |           |
| Risk of bias                                       |           |
| <b>II. Supplementary Figures.....</b>              | <b>13</b> |

# I. Supplementary Materials and Methods

## 1. Search strategy and results

### (1) Summary of search results

| No.                                              | DB               | Results | Duplication |
|--------------------------------------------------|------------------|---------|-------------|
| 1                                                | PubMed (Medline) | 999     |             |
| 2                                                | EMBASE           | 1,717   |             |
| 3                                                | Cochrane Library | 522     |             |
| 4                                                | Web of Science   | 567     | 1,256       |
| 5                                                | KoreaMed         | 3       |             |
| Number of Search Results (including duplication) |                  | 3,808   |             |
| Number of Search Results (without duplication)   |                  | 2,552   |             |

### (2) Keywords

| PICO     | Fields | Keywords                    | Remarks  |
|----------|--------|-----------------------------|----------|
| <b>P</b> | MeSH   | Breast neoplasms            | <b>A</b> |
|          | TIAB   | Breast neoplasm*            | <b>B</b> |
|          | TIAB   | Breast tumor*               |          |
|          | TIAB   | Breast carcinoma*           |          |
|          | TIAB   | Human mammary neoplasm*     |          |
|          | TIAB   | Breast cancer*              |          |
|          | TIAB   | Mammary neoplasm*           |          |
|          | TIAB   | Mammary cancer*             |          |
|          | TIAB   | Mammary carcinoma*          |          |
|          | TIAB   | Mammary tumor*              |          |
|          | TIAB   | Breast malignant neoplasm*  |          |
|          | TIAB   | Breast malignant tumor*     |          |
|          | TIAB   | Breast malignant cancer*    |          |
|          | TIAB   | Breast malignant carcinoma* |          |
|          |        | <b>A OR B</b>               | <b>C</b> |
| <b>I</b> | MeSH   | Tamoxifen                   | <b>D</b> |
|          | MeSH   | Toremifene                  |          |
|          | MeSH   | Letrozole                   |          |
|          | MeSH   | Anastrozole                 |          |

|  |                       |                                        |          |
|--|-----------------------|----------------------------------------|----------|
|  | MeSH                  | Antineoplastic agents, hormonal        |          |
|  | MeSH                  | Selective estrogen receptor modulators |          |
|  | MeSH                  | Aromatase inhibitors                   |          |
|  | Supplementary Concept | Exemestane                             | <b>E</b> |
|  | TIAB                  | Tamoxifen*                             | <b>F</b> |
|  | TIAB                  | ICI-47699                              |          |
|  | TIAB                  | ICI47699                               |          |
|  | TIAB                  | Nolvadex                               |          |
|  | TIAB                  | Novaldex                               |          |
|  | TIAB                  | Tamoxifen citrate                      |          |
|  | TIAB                  | Tomaxithen                             |          |
|  | TIAB                  | Zitazonium                             |          |
|  | TIAB                  | ICI-46474                              |          |
|  | TIAB                  | ICI46474                               |          |
|  | TIAB                  | ICI-46,474                             |          |
|  | TIAB                  | ICI46,474                              |          |
|  | TIAB                  | Soltamox                               |          |
|  | TIAB                  | Crisafeno                              |          |
|  | TIAB                  | Toremifene                             |          |
|  | TIAB                  | Fareston                               |          |
|  | TIAB                  | FC-1157a                               |          |
|  | TIAB                  | FC1157a                                |          |
|  | TIAB                  | CGS-20267                              |          |
|  | TIAB                  | CGS20267                               |          |
|  | TIAB                  | Femara                                 |          |
|  | TIAB                  | Letrozole                              |          |
|  | TIAB                  | Anastrozole                            |          |
|  | TIAB                  | Anastrozole                            |          |
|  | TIAB                  | ICI D1033                              |          |
|  | TIAB                  | ZD-1033                                |          |
|  | TIAB                  | ZD1033                                 |          |
|  | TIAB                  | Arimidex                               |          |
|  | TIAB                  | Exemestane                             |          |
|  | TIAB                  | Examestane                             |          |
|  | TIAB                  | FCE 24304                              |          |
|  | TIAB                  | FCE24304                               |          |
|  | TIAB                  | Aromasin                               |          |
|  | TIAB                  | Hormonal antineoplast*                 |          |

|          |      |                                        |          |
|----------|------|----------------------------------------|----------|
|          | TIAB | Antineoplastic hormon*                 | <b>G</b> |
|          | TIAB | SERM*                                  |          |
|          | TIAB | Selective estrogen receptor modulator* |          |
|          | TIAB | Aromatase inhibitor*                   |          |
|          |      | <b>D O R E O R F</b>                   |          |
| <b>O</b> | MeSH | Angina pectoris                        | <b>H</b> |
|          | MeSH | Aortic valve stenosis                  |          |
|          | MeSH | Arrhythmias, cardiac                   |          |
|          | MeSH | Atherosclerosis                        |          |
|          | MeSH | Atrial fibrillation                    |          |
|          | MeSH | Cardiomyopathies                       |          |
|          | MeSH | Cardiovascular diseases                |          |
|          | MeSH | Coronary artery disease                |          |
|          | MeSH | Embolism                               |          |
|          | MeSH | Heart failure                          |          |
|          | MeSH | Myocardial infarction                  |          |
|          | MeSH | Myocardial ischemia                    |          |
|          | MeSH | Myocarditis                            |          |
|          | MeSH | Peripheral vascular diseases           |          |
|          | MeSH | Stroke                                 |          |
|          | MeSH | Thromboembolism                        |          |
|          | MeSH | Venous thromboembolism                 |          |
|          | MeSH | Heart diseases                         |          |
|          | TIAB | Acute stroke*                          | <b>I</b> |
|          | TIAB | Angina                                 |          |
|          | TIAB | Angor pectoris                         |          |
|          | TIAB | Aortic stenosis*                       |          |
|          | TIAB | Aortic valve stenosis*                 |          |
|          | TIAB | Apoplexy                               |          |
|          | TIAB | Arrhythmia                             |          |
|          | TIAB | Arrhythmia                             |          |
|          | TIAB | Atherogenesis                          |          |
|          | TIAB | Atherosclerosis*                       |          |
|          | TIAB | Atrial fibrillation*                   |          |
|          | TIAB | Auricular fibrillation*                |          |
|          | TIAB | Brain vascular accident*               |          |
|          | TIAB | Cardiac arrhythmia*                    |          |
|          | TIAB | Cardiac decompensation*                |          |

|  |      |                              |
|--|------|------------------------------|
|  | TIAB | Cardiac disease*             |
|  | TIAB | Cardiac dysrhythmia*         |
|  | TIAB | Cardiac event*               |
|  | TIAB | Cardiac failure              |
|  | TIAB | Cardiomyopath*               |
|  | TIAB | Cardiovascular disease*      |
|  | TIAB | Cardiovascular event*        |
|  | TIAB | Cardiovascular outcome*      |
|  | TIAB | Cardiovascular stroke*       |
|  | TIAB | Carditis                     |
|  | TIAB | Cerebral stroke*             |
|  | TIAB | Cerebrovascular accident*    |
|  | TIAB | Cerebrovascular apoplexy     |
|  | TIAB | Cerebrovascular stroke*      |
|  | TIAB | Coronary arteriosclerosis*   |
|  | TIAB | Coronary artery disease*     |
|  | TIAB | Coronary atherosclerosis*    |
|  | TIAB | Embolism*                    |
|  | TIAB | Embolus                      |
|  | TIAB | Heart attack*                |
|  | TIAB | Heart decompensation*        |
|  | TIAB | Heart disease*               |
|  | TIAB | Heart event*                 |
|  | TIAB | Heart failure                |
|  | TIAB | Ischaemic heart disease*     |
|  | TIAB | Ischemic heart disease*      |
|  | TIAB | Major adverse cardiac event* |
|  | TIAB | Myocardial decompensation*   |
|  | TIAB | Myocardial disease*          |
|  | TIAB | Myocardial failure           |
|  | TIAB | Myocardial infarct*          |
|  | TIAB | Myocardial ischaemi*         |
|  | TIAB | Myocardial ischemi*          |
|  | TIAB | Myocardiopath*               |
|  | TIAB | Myocarditides                |
|  | TIAB | Myocarditis                  |
|  | TIAB | Paroxysmal atrial            |
|  | TIAB | Peripheral angiopath*        |

|  |      |                              |          |
|--|------|------------------------------|----------|
|  | TIAB | Peripheral vascular disease* |          |
|  | TIAB | Stenocardia*                 |          |
|  | TIAB | Stroke*                      |          |
|  | TIAB | Thromboembolism*             |          |
|  | TIAB | Transient ischaemi*          |          |
|  | TIAB | Transient ischemi*           |          |
|  |      | <b>H OR I</b>                | <b>J</b> |
|  |      | <b>C AND G AND J</b>         | <b>K</b> |

### (3) Search strategy

| DB     | Search Strategy                                                                                                                                                                                                                                                                                                                                                                                                                                                                                                                                                                                                                                                                                                                                                                                                                                                                                                                                                                                                                                                                                                                                                                                                                                                                                                                                                                                                                                                                                                                                                                                                                                                                                                                                                                                                                                                                                                                                                                                                                                                                                                                                                                                                                                                                                                                                                                                                                                                                                                                                                                                                                                                                                                                                                                                                                                                                                                                                                                                                                                                                                                                                                                                                                                                                                                                                                                                                                                                                                                                                                                                                                                                                                                                                                                                                                                                                                                                                                                                                                                                                                                                                       |
|--------|-------------------------------------------------------------------------------------------------------------------------------------------------------------------------------------------------------------------------------------------------------------------------------------------------------------------------------------------------------------------------------------------------------------------------------------------------------------------------------------------------------------------------------------------------------------------------------------------------------------------------------------------------------------------------------------------------------------------------------------------------------------------------------------------------------------------------------------------------------------------------------------------------------------------------------------------------------------------------------------------------------------------------------------------------------------------------------------------------------------------------------------------------------------------------------------------------------------------------------------------------------------------------------------------------------------------------------------------------------------------------------------------------------------------------------------------------------------------------------------------------------------------------------------------------------------------------------------------------------------------------------------------------------------------------------------------------------------------------------------------------------------------------------------------------------------------------------------------------------------------------------------------------------------------------------------------------------------------------------------------------------------------------------------------------------------------------------------------------------------------------------------------------------------------------------------------------------------------------------------------------------------------------------------------------------------------------------------------------------------------------------------------------------------------------------------------------------------------------------------------------------------------------------------------------------------------------------------------------------------------------------------------------------------------------------------------------------------------------------------------------------------------------------------------------------------------------------------------------------------------------------------------------------------------------------------------------------------------------------------------------------------------------------------------------------------------------------------------------------------------------------------------------------------------------------------------------------------------------------------------------------------------------------------------------------------------------------------------------------------------------------------------------------------------------------------------------------------------------------------------------------------------------------------------------------------------------------------------------------------------------------------------------------------------------------------------------------------------------------------------------------------------------------------------------------------------------------------------------------------------------------------------------------------------------------------------------------------------------------------------------------------------------------------------------------------------------------------------------------------------------------------------------------|
| PubMed | (("breast neoplasms"[MeSH Terms] OR ("breast neoplasm"[Title/Abstract] OR "breast tumor"[Title/Abstract] OR "breast carcinoma"[Title/Abstract] OR "human mammary neoplasm"[Title/Abstract] OR "breast cancer"[Title/Abstract] OR "mammary neoplasm"[Title/Abstract] OR "mammary cancer"[Title/Abstract] OR "mammary carcinoma"[Title/Abstract] OR "mammary tumor"[Title/Abstract] OR "breast malignant neoplasm"[Title/Abstract] OR "breast malignant tumor"[Title/Abstract])) AND ("tamoxifen"[MeSH Terms] OR "Toremifene"[MeSH Terms] OR "Letrozole"[MeSH Terms] OR "Anastrozole"[MeSH Terms] OR "antineoplastic agents, hormonal"[MeSH Terms] OR "selective estrogen receptor modulators"[MeSH Terms] OR "aromatase inhibitors"[MeSH Terms] OR "Exemestane"[Supplementary Concept] OR ("tamoxifen"[Title/Abstract] OR "ICI-47699"[Title/Abstract] OR "Nolvadex"[Title/Abstract] OR "Novaldex"[Title/Abstract] OR "Tamoxifen citrate"[Title/Abstract] OR "Zitazonium"[Title/Abstract] OR "ICI-46474"[Title/Abstract] OR "ICI46474"[Title/Abstract] OR "ICI-46,474"[Title/Abstract] OR "Soltamox"[Title/Abstract] OR "Crisafeno"[Title/Abstract] OR "Toremifene"[Title/Abstract] OR "Fareston"[Title/Abstract] OR "FC-1157a"[Title/Abstract] OR "FC1157a"[Title/Abstract] OR "CGS-20267"[Title/Abstract] OR "CGS20267"[Title/Abstract] OR "Femara"[Title/Abstract] OR "Letrozole"[Title/Abstract] OR "Anastrozole"[Title/Abstract] OR "Anastrozole"[Title/Abstract] OR "ICI D1033"[Title/Abstract] OR "ZD-1033"[Title/Abstract] OR "ZD1033"[Title/Abstract] OR "Arimidex"[Title/Abstract] OR "Exemestane"[Title/Abstract] OR "Examestane"[Title/Abstract] OR "FCE 24304"[Title/Abstract] OR "FCE24304"[Title/Abstract] OR "Aromasin"[Title/Abstract] OR "hormonal antineoplast"[Title/Abstract] OR "antineoplastic hormon"[Title/Abstract] OR "serm"[Title/Abstract] OR "selective estrogen receptor modulator"[Title/Abstract] OR "aromatase inhibitor"[Title/Abstract])) AND ("acute stroke"[Title/Abstract] OR "Angina"[Title/Abstract] OR "Angor pectoris"[Title/Abstract] OR "aortic stenosis"[Title/Abstract] OR "aortic valve stenosis"[Title/Abstract] OR "Apoplexy"[Title/Abstract] OR "Arrhythmia"[Title/Abstract] OR "Arrhythmia"[Title/Abstract] OR "Atherogenesis"[Title/Abstract] OR "atherosclerosis"[Title/Abstract] OR "atrial fibrillation"[Title/Abstract] OR "auricular fibrillation"[Title/Abstract] OR "brain vascular accident"[Title/Abstract] OR "cardiac arrhythmia"[Title/Abstract] OR "cardiac decompensation"[Title/Abstract] OR "cardiac disease"[Title/Abstract] OR "cardiac dysrhythmia"[Title/Abstract] OR "cardiac event"[Title/Abstract] OR "Cardiac failure"[Title/Abstract] OR "cardiomyopath"[Title/Abstract] OR "cardiovascular disease"[Title/Abstract] OR "cardiovascular event"[Title/Abstract] OR "cardiovascular outcome"[Title/Abstract] OR "cardiovascular stroke"[Title/Abstract] OR "Carditis"[Title/Abstract] OR "cerebral stroke"[Title/Abstract] OR "cerebrovascular accident"[Title/Abstract] OR "Cerebrovascular apoplexy"[Title/Abstract] OR "cerebrovascular stroke"[Title/Abstract] OR "coronary arteriosclerosis"[Title/Abstract] OR "coronary artery disease"[Title/Abstract] OR "coronary atherosclerosis"[Title/Abstract] OR "embolism"[Title/Abstract] OR "Embolus"[Title/Abstract] OR "heart attack"[Title/Abstract] OR "heart decompensation"[Title/Abstract] OR "heart disease"[Title/Abstract] OR "heart event"[Title/Abstract] OR "Heart failure"[Title/Abstract] OR "ischemic heart disease"[Title/Abstract] OR "ischemic heart disease"[Title/Abstract] OR "major adverse cardiac event"[Title/Abstract] OR "myocardial decompensation"[Title/Abstract] OR "myocardial disease"[Title/Abstract] OR "Myocardial failure"[Title/Abstract] OR "myocardial infarct"[Title/Abstract] OR "myocardial ischaemi"[Title/Abstract] OR "myocardial ischemi"[Title/Abstract] OR "myocardiopath"[Title/Abstract] OR "Myocarditides"[Title/Abstract] OR "Myocarditis"[Title/Abstract] OR "Paroxysmal atrial"[Title/Abstract] OR "peripheral angiopath"[Title/Abstract] OR "peripheral vascular |

|        |                                                                                                                                                                                                                                                                                                                                                                                                                                                                                                                                                                                                                                                                                                                                                                                                                                                                                                                                                                                                                                                                                                                                                                                                                                                                                                                                                                                                                                                                                                                                                                                                                                                                                                                                                                                                                                                                                                                                                                                                                                                                                                                                                                                                                                                                                                                                                                                                                                                                                                                                                                                                                                                                                                                                                                                                                                                                                                                                                                                                                                                                                                                                                                                                                                                                                                                                                                                                                                                                                                                                                                                                                                                                                                                                                                                                                                                                                                                                                                                                                                                                                                                                                           |
|--------|-----------------------------------------------------------------------------------------------------------------------------------------------------------------------------------------------------------------------------------------------------------------------------------------------------------------------------------------------------------------------------------------------------------------------------------------------------------------------------------------------------------------------------------------------------------------------------------------------------------------------------------------------------------------------------------------------------------------------------------------------------------------------------------------------------------------------------------------------------------------------------------------------------------------------------------------------------------------------------------------------------------------------------------------------------------------------------------------------------------------------------------------------------------------------------------------------------------------------------------------------------------------------------------------------------------------------------------------------------------------------------------------------------------------------------------------------------------------------------------------------------------------------------------------------------------------------------------------------------------------------------------------------------------------------------------------------------------------------------------------------------------------------------------------------------------------------------------------------------------------------------------------------------------------------------------------------------------------------------------------------------------------------------------------------------------------------------------------------------------------------------------------------------------------------------------------------------------------------------------------------------------------------------------------------------------------------------------------------------------------------------------------------------------------------------------------------------------------------------------------------------------------------------------------------------------------------------------------------------------------------------------------------------------------------------------------------------------------------------------------------------------------------------------------------------------------------------------------------------------------------------------------------------------------------------------------------------------------------------------------------------------------------------------------------------------------------------------------------------------------------------------------------------------------------------------------------------------------------------------------------------------------------------------------------------------------------------------------------------------------------------------------------------------------------------------------------------------------------------------------------------------------------------------------------------------------------------------------------------------------------------------------------------------------------------------------------------------------------------------------------------------------------------------------------------------------------------------------------------------------------------------------------------------------------------------------------------------------------------------------------------------------------------------------------------------------------------------------------------------------------------------------------------------|
|        | <p>disease*[Title/Abstract] OR "stenocardia"[Title/Abstract] OR "stroke"[Title/Abstract] OR "thromboembolism"[Title/Abstract] OR "transient ischaemi"[Title/Abstract] OR "transient ischemi"[Title/Abstract] OR ("angina pectoris"[MeSH Terms] OR "aortic valve stenosis"[MeSH Terms] OR "arrhythmias, cardiac"[MeSH Terms] OR "atherosclerosis"[MeSH Terms] OR "atrial fibrillation"[MeSH Terms] OR "cardiomyopathies"[MeSH Terms] OR "cardiovascular diseases"[MeSH Terms] OR "coronary artery disease"[MeSH Terms] OR "embolism"[MeSH Terms] OR "Heart failure"[MeSH Terms] OR "myocardial infarction"[MeSH Terms] OR ("myocardial ischemia"[MeSH Terms] OR "coronary artery disease"[MeSH Terms]) OR "Myocarditis"[MeSH Terms] OR "peripheral vascular diseases"[MeSH Terms] OR "stroke"[MeSH Terms] OR "thromboembolism"[MeSH Terms] OR "venous thromboembolism"[MeSH Terms] OR "heart diseases"[MeSH Terms])) NOT ("animals"[MeSH Terms:noexp] NOT ("animals"[MeSH Terms:noexp] AND "humans"[MeSH Terms]))</p>                                                                                                                                                                                                                                                                                                                                                                                                                                                                                                                                                                                                                                                                                                                                                                                                                                                                                                                                                                                                                                                                                                                                                                                                                                                                                                                                                                                                                                                                                                                                                                                                                                                                                                                                                                                                                                                                                                                                                                                                                                                                                                                                                                                                                                                                                                                                                                                                                                                                                                                                                                                                                                                                                                                                                                                                                                                                                                                                                                                                                                                                                                                                      |
| EMBASE | <p>((('breast tumor'/exp OR 'breast carcinoma'/exp OR 'breast cancer'/exp) OR ('breast neoplasm*':ab,ti OR 'breast tumor*':ab,ti OR 'breast carcinoma*':ab,ti OR 'human mammary neoplasm*':ab,ti OR 'breast cancer*':ab,ti OR 'mammary neoplasm*':ab,ti OR 'mammary cancer*':ab,ti OR 'mammary carcinoma*':ab,ti OR 'mammary tumor*':ab,ti OR 'breast malignant neoplasm*':ab,ti OR 'breast malignant tumor*':ab,ti OR 'breast malignant cancer*':ab,ti OR 'breast malignant carcinoma*':ab,ti)) AND ((('tamoxifen'/exp OR 'toremifene'/exp OR 'letrozole'/exp OR 'anastrozole'/exp OR 'selective estrogen receptor modulator'/exp OR 'aromatase inhibitor'/exp OR 'exemestane'/exp OR 'tamoxifen citrate'/exp OR 'antineoplastic hormone agonists and antagonists'/exp) OR (tamoxifen*':ab,ti OR 'ici 47699':ab,ti OR 'ici47699':ab,ti OR 'nolvadex':ab,ti OR 'tamoxifen citrate':ab,ti OR 'tomaxithen':ab,ti OR 'zitazonium':ab,ti OR 'ici-46474':ab,ti OR 'ici46474':ab,ti OR 'ici-46,474':ab,ti OR 'ici46,474':ab,ti OR 'soltamox':ab,ti OR 'crisafeno':ab,ti OR 'toremifene':ab,ti OR 'fareston':ab,ti OR 'fc-1157a':ab,ti OR 'fc1157a':ab,ti OR 'cgs-20267':ab,ti OR 'cgs20267':ab,ti OR 'femara':ab,ti OR 'letrozole':ab,ti OR 'anastrozole':ab,ti OR 'anastrozole':ab,ti OR 'ici d1033':ab,ti OR 'zd-1033':ab,ti OR 'zd1033':ab,ti OR 'arimidex':ab,ti OR 'exemestane':ab,ti OR 'examestane':ab,ti OR 'fce 24304':ab,ti OR 'fce24304':ab,ti OR 'aromasin':ab,ti OR 'hormonal antineoplast*':ab,ti OR 'antineoplastic hormon*':ab,ti OR 'serm*':ab,ti OR 'selective estrogen receptor modulator*':ab,ti OR 'aromatase inhibitor*':ab,ti)) AND ((('angina pectoris'/exp OR 'aortic valve stenosis'/exp OR 'heart arrhythmia'/exp OR 'atherosclerosis'/exp OR 'atrial fibrillation'/exp OR 'cardiomyopathy'/exp OR 'cardiovascular disease'/exp OR 'coronary artery disease'/exp OR 'embolism'/exp OR 'heart failure'/exp OR 'heart infarction'/exp OR 'heart muscle ischemia'/exp OR 'myocarditis'/exp OR 'peripheral vascular disease'/exp OR 'cerebrovascular accident'/exp OR 'thromboembolism'/exp OR 'venous thromboembolism'/exp OR 'heart disease'/exp OR 'aortic stenosis'/exp OR 'atherogenesis'/exp OR 'ambulatory electrocardiographic monitor'/exp OR 'carditis'/exp OR 'coronary artery atherosclerosis'/exp OR 'ischemic heart disease'/exp OR 'major adverse cardiac event'/exp OR 'myocardial disease'/exp OR 'paroxysmal atrial fibrillation'/exp OR 'transient ischemic attack'/exp) OR ('acute stroke*':ab,ti OR 'angina':ab,ti OR 'angor pectoris':ab,ti OR 'aortic stenosis*':ab,ti OR 'aortic valve stenosis*':ab,ti OR 'apoplexy':ab,ti OR 'arrhythmia':ab,ti OR 'arrythmia*':ab,ti OR 'atherogenesis':ab,ti OR 'atherosclerosis*':ab,ti OR 'atrial fibrillation*':ab,ti OR 'auricular fibrillation*':ab,ti OR 'brain vascular accident*':ab,ti OR 'cardiac arrhythmia*':ab,ti OR 'cardiac decompensation*':ab,ti OR 'cardiac disease*':ab,ti OR 'cardiac dysrhythmia*':ab,ti OR 'cardiac event*':ab,ti OR 'cardiac failure':ab,ti OR 'cardiomyopath*':ab,ti OR 'cardiovascular disease*':ab,ti OR 'cardiovascular event*':ab,ti OR 'cardiovascular outcome*':ab,ti OR 'cardiovascular stroke*':ab,ti OR 'carditis':ab,ti OR 'cerebral stroke*':ab,ti OR 'cerebrovascular accident*':ab,ti OR 'cerebrovascular apoplexy':ab,ti OR 'cerebrovascular stroke*':ab,ti OR 'coronary arteriosclerosis*':ab,ti OR 'coronary artery disease*':ab,ti OR 'coronary atherosclerosis*':ab,ti OR 'embolism*':ab,ti OR 'embolus':ab,ti OR 'heart arrhythmia*':ab,ti OR 'heart attack*':ab,ti OR 'heart decompensation*':ab,ti OR 'heart disease*':ab,ti OR 'heart event*':ab,ti OR 'heart failure':ab,ti OR 'heart muscle ischemi*':ab,ti OR 'ischaemic heart disease*':ab,ti OR 'ischemic heart disease*':ab,ti OR 'major adverse cardiac event*':ab,ti OR 'myocardial decompensation*':ab,ti OR 'myocardial disease*':ab,ti OR 'myocardial failure':ab,ti OR 'myocardial infarct*':ab,ti OR 'myocardial ischaemi*':ab,ti OR 'myocardial ischemi*':ab,ti OR 'myocardiopath*':ab,ti OR 'myocarditides':ab,ti OR 'myocarditis':ab,ti OR</p> |

|                 |                                                                                                                                                                                                                                                                                                                                                                                                                                                                                                                                                                                                                                                                                                                                                                                                                                                                                                                                                                                                                                                                                                                                                                                                                                                                                                                                                                                                                                                                                                                                                                                                                                                                                                                                                                                                                                                                                                                                                                                                                                                                                                                                                                                                                                                                                                                                                                                                                                                                                                                                                                                                                                                                                                                                                                                                                                                                                                                                                                                                                                                                                                                                                                                                                                                                                                                                                                                                                                                                                                                                                                                                                                                                                                                                                                                                                                                                                                                                                                                                                                                                                                                                                                                                                                                                                                                                                                                                                                                                                                                                                                                                                                                                                                                                                                                                                           |
|-----------------|---------------------------------------------------------------------------------------------------------------------------------------------------------------------------------------------------------------------------------------------------------------------------------------------------------------------------------------------------------------------------------------------------------------------------------------------------------------------------------------------------------------------------------------------------------------------------------------------------------------------------------------------------------------------------------------------------------------------------------------------------------------------------------------------------------------------------------------------------------------------------------------------------------------------------------------------------------------------------------------------------------------------------------------------------------------------------------------------------------------------------------------------------------------------------------------------------------------------------------------------------------------------------------------------------------------------------------------------------------------------------------------------------------------------------------------------------------------------------------------------------------------------------------------------------------------------------------------------------------------------------------------------------------------------------------------------------------------------------------------------------------------------------------------------------------------------------------------------------------------------------------------------------------------------------------------------------------------------------------------------------------------------------------------------------------------------------------------------------------------------------------------------------------------------------------------------------------------------------------------------------------------------------------------------------------------------------------------------------------------------------------------------------------------------------------------------------------------------------------------------------------------------------------------------------------------------------------------------------------------------------------------------------------------------------------------------------------------------------------------------------------------------------------------------------------------------------------------------------------------------------------------------------------------------------------------------------------------------------------------------------------------------------------------------------------------------------------------------------------------------------------------------------------------------------------------------------------------------------------------------------------------------------------------------------------------------------------------------------------------------------------------------------------------------------------------------------------------------------------------------------------------------------------------------------------------------------------------------------------------------------------------------------------------------------------------------------------------------------------------------------------------------------------------------------------------------------------------------------------------------------------------------------------------------------------------------------------------------------------------------------------------------------------------------------------------------------------------------------------------------------------------------------------------------------------------------------------------------------------------------------------------------------------------------------------------------------------------------------------------------------------------------------------------------------------------------------------------------------------------------------------------------------------------------------------------------------------------------------------------------------------------------------------------------------------------------------------------------------------------------------------------------------------------------------------------------------|
|                 | <p>'paroxysmal atrial':ab,ti OR 'peripheral angiopath*':ab,ti OR 'peripheral vascular disease*':ab,ti OR 'stenocardia*':ab,ti OR 'stroke*':ab,ti OR 'thromboembolism*':ab,ti OR 'transient ischaemi*':ab,ti OR 'transient ischemi*':ab,ti))) NOT ('animal'/de NOT ('animal'/de AND 'human'/exp))</p>                                                                                                                                                                                                                                                                                                                                                                                                                                                                                                                                                                                                                                                                                                                                                                                                                                                                                                                                                                                                                                                                                                                                                                                                                                                                                                                                                                                                                                                                                                                                                                                                                                                                                                                                                                                                                                                                                                                                                                                                                                                                                                                                                                                                                                                                                                                                                                                                                                                                                                                                                                                                                                                                                                                                                                                                                                                                                                                                                                                                                                                                                                                                                                                                                                                                                                                                                                                                                                                                                                                                                                                                                                                                                                                                                                                                                                                                                                                                                                                                                                                                                                                                                                                                                                                                                                                                                                                                                                                                                                                      |
| <b>Cochrane</b> | <p>((MeSH descriptor: [Breast Neoplasms] explode all trees) OR ((Breast neoplasm*):ti,ab,kw OR (Breast tumor*):ti,ab,kw OR (Breast carcinoma*):ti,ab,kw OR (Human mammary neoplasm*):ti,ab,kw OR (Breast cancer*):ti,ab,kw OR (Mammary neoplasm*):ti,ab,kw OR (Mammary cancer*):ti,ab,kw OR (Mammary carcinoma*):ti,ab,kw OR (Mammary tumor*):ti,ab,kw OR (Breast malignant neoplasm*):ti,ab,kw OR (Breast malignant tumor*):ti,ab,kw OR (Breast malignant cancer*):ti,ab,kw OR (Breast malignant carcinoma*):ti,ab,kw)) AND ((MeSH descriptor: [Tamoxifen] explode all trees OR MeSH descriptor: [Toremifene] explode all trees OR MeSH descriptor: [Letrozole] explode all trees OR MeSH descriptor: [Anastrozole] explode all trees OR MeSH descriptor: [Antineoplastic Agents, Hormonal] explode all trees OR MeSH descriptor: [Selective Estrogen Receptor Modulators] explode all trees OR MeSH descriptor: [Aromatase Inhibitors] explode all trees) OR ((Tamoxifen*):ti,ab,kw OR (ICI-47699):ti,ab,kw OR (ICI47699):ti,ab,kw OR (Nolvadex):ti,ab,kw OR (Novaldex):ti,ab,kw OR (Tamoxifen citrate):ti,ab,kw OR (Tomaxithen):ti,ab,kw OR (Zitazonium):ti,ab,kw OR (ICI-46474):ti,ab,kw OR (ICI46474):ti,ab,kw OR (ICI-46,474):ti,ab,kw OR (ICI46,474):ti,ab,kw OR (Soltamox):ti,ab,kw OR (Crisafeno):ti,ab,kw OR (Toremifene):ti,ab,kw OR (Fareston):ti,ab,kw OR (FC-1157a):ti,ab,kw OR (FC1157a):ti,ab,kw OR (CGS-20267):ti,ab,kw OR (CGS20267):ti,ab,kw OR (Femara):ti,ab,kw OR (Letrozole):ti,ab,kw OR (Anastrozole):ti,ab,kw OR (Anastrozole):ti,ab,kw OR (ICI D1033):ti,ab,kw OR (ZD-1033):ti,ab,kw OR (ZD1033):ti,ab,kw OR (Arimidex):ti,ab,kw OR (Exemestane):ti,ab,kw OR (Examestane):ti,ab,kw OR (FCE 24304):ti,ab,kw OR (FCE24304):ti,ab,kw OR (Aromasin):ti,ab,kw OR (Hormonal antineoplast*):ti,ab,kw OR (Antineoplastic hormon*):ti,ab,kw OR (SERM*):ti,ab,kw OR (Selective estrogen receptor modulator*):ti,ab,kw OR (Aromatase inhibitor*):ti,ab,kw)) AND ((MeSH descriptor: [Angina Pectoris] explode all trees OR MeSH descriptor: [Aortic Valve Stenosis] explode all trees OR MeSH descriptor: [Arrhythmias, Cardiac] explode all trees OR MeSH descriptor: [Atherosclerosis] explode all trees OR MeSH descriptor: [Atrial Fibrillation] explode all trees OR MeSH descriptor: [Cardiomyopathies] explode all trees OR MeSH descriptor: [Cardiovascular Diseases] explode all trees OR MeSH descriptor: [Coronary Artery Disease] explode all trees OR MeSH descriptor: [Embolism] explode all trees OR MeSH descriptor: [Heart Failure] explode all trees OR MeSH descriptor: [Myocardial Infarction] explode all trees OR MeSH descriptor: [Myocardial Ischemia] explode all trees OR MeSH descriptor: [Myocarditis] explode all trees OR MeSH descriptor: [Peripheral Vascular Diseases] explode all trees OR MeSH descriptor: [Stroke] explode all trees OR MeSH descriptor: [Thromboembolism] explode all trees OR MeSH descriptor: [Venous Thromboembolism] explode all trees OR MeSH descriptor: [Heart Diseases] explode all trees) OR ((Acute stroke*):ti,ab,kw OR (Angina):ti,ab,kw OR (Angor pectoris):ti,ab,kw OR (Aortic stenosis*):ti,ab,kw OR (Aortic valve stenosis*):ti,ab,kw OR (Apoplexy):ti,ab,kw OR (Arrhythmia):ti,ab,kw OR (Arrhythmia):ti,ab,kw OR (Atherogenesis):ti,ab,kw OR (Atherosclerosis*):ti,ab,kw OR (Atrial fibrillation*):ti,ab,kw OR (Auricular fibrillation*):ti,ab,kw OR (Brain vascular accident*):ti,ab,kw OR (Cardiac arrhythmia*):ti,ab,kw OR (Cardiac decompensation*):ti,ab,kw OR (Cardiac disease*):ti,ab,kw OR (Cardiac dysrhythmia*):ti,ab,kw OR (Cardiac event*):ti,ab,kw OR (Cardiac failure):ti,ab,kw OR (Cardiomyopath*):ti,ab,kw OR (Cardiovascular disease*):ti,ab,kw OR (Cardiovascular event*):ti,ab,kw OR (Cardiovascular outcome*):ti,ab,kw OR (Cardiovascular stroke*):ti,ab,kw OR (Carditis):ti,ab,kw OR (Cerebral stroke*):ti,ab,kw OR (Cerebrovascular accident*):ti,ab,kw OR (Cerebrovascular apoplexy):ti,ab,kw OR (Cerebrovascular stroke*):ti,ab,kw OR (Coronary arteriosclerosis*):ti,ab,kw OR (Coronary artery disease*):ti,ab,kw OR (Coronary atherosclerosis*):ti,ab,kw OR (Embolism*):ti,ab,kw OR (Embolus):ti,ab,kw OR (Heart attack*):ti,ab,kw OR (Heart decompensation*):ti,ab,kw OR (Heart disease*):ti,ab,kw OR (Heart event*):ti,ab,kw OR (Heart failure):ti,ab,kw OR (Ischaemic heart disease*):ti,ab,kw OR (Ischemic heart disease*):ti,ab,kw OR (Major adverse cardiac event*):ti,ab,kw OR (Myocardial decompensation*):ti,ab,kw OR (Myocardial disease*):ti,ab,kw OR (Myocardial failure):ti,ab,kw OR (Myocardial infarct*):ti,ab,kw OR (Myocardial ischaemi*):ti,ab,kw OR (Myocardial ischemi*):ti,ab,kw OR (Myocardiopath*):ti,ab,kw OR (Myocarditides):ti,ab,kw OR (Myocarditis):ti,ab,kw OR (Paroxysmal</p> |



|                       |                                                                                                                                                                                                                                                                                                                                                                                                                                                                                                                                                                                                                                                                                                                                                                                                                                                                                                                                                                                                                                                                                                                                                                                                                                                                                                                                                                                                                                                                                                                                                                                                                                                                                                                                                                                                                                                                                                                                                                                                                                                                                                                                                                                                                                                                                                                                                                                                                                                                                                                                                                                                                                                                                                                                                                                                                                                                                                                                                                                                                                                                                                                                                                                                                                                                                                                                                                                                                                                                                                                                                                                                                                                                                                                                                                                                                                                                                                                                                                                                                                                                                                                                                                                                                                                                                                                                                                                                                                                                                                                                                                                                                                                      |
|-----------------------|------------------------------------------------------------------------------------------------------------------------------------------------------------------------------------------------------------------------------------------------------------------------------------------------------------------------------------------------------------------------------------------------------------------------------------------------------------------------------------------------------------------------------------------------------------------------------------------------------------------------------------------------------------------------------------------------------------------------------------------------------------------------------------------------------------------------------------------------------------------------------------------------------------------------------------------------------------------------------------------------------------------------------------------------------------------------------------------------------------------------------------------------------------------------------------------------------------------------------------------------------------------------------------------------------------------------------------------------------------------------------------------------------------------------------------------------------------------------------------------------------------------------------------------------------------------------------------------------------------------------------------------------------------------------------------------------------------------------------------------------------------------------------------------------------------------------------------------------------------------------------------------------------------------------------------------------------------------------------------------------------------------------------------------------------------------------------------------------------------------------------------------------------------------------------------------------------------------------------------------------------------------------------------------------------------------------------------------------------------------------------------------------------------------------------------------------------------------------------------------------------------------------------------------------------------------------------------------------------------------------------------------------------------------------------------------------------------------------------------------------------------------------------------------------------------------------------------------------------------------------------------------------------------------------------------------------------------------------------------------------------------------------------------------------------------------------------------------------------------------------------------------------------------------------------------------------------------------------------------------------------------------------------------------------------------------------------------------------------------------------------------------------------------------------------------------------------------------------------------------------------------------------------------------------------------------------------------------------------------------------------------------------------------------------------------------------------------------------------------------------------------------------------------------------------------------------------------------------------------------------------------------------------------------------------------------------------------------------------------------------------------------------------------------------------------------------------------------------------------------------------------------------------------------------------------------------------------------------------------------------------------------------------------------------------------------------------------------------------------------------------------------------------------------------------------------------------------------------------------------------------------------------------------------------------------------------------------------------------------------------------------------------------|
|                       | atrial):ti,ab,kw OR (Peripheral angiopath*):ti,ab,kw OR (Peripheral vascular disease*):ti,ab,kw OR (Stenocardia*):ti,ab,kw OR (Stroke*):ti,ab,kw OR (Thromboembolism*):ti,ab,kw OR (Transient ischaemi*):ti,ab,kw OR (Transient ischemi*):ti,ab,kw)) NOT (MeSH descriptor: [Animals] this term only NOT (MeSH descriptor: [Animals] this term only AND MeSH descriptor: [Humans] this term only))                                                                                                                                                                                                                                                                                                                                                                                                                                                                                                                                                                                                                                                                                                                                                                                                                                                                                                                                                                                                                                                                                                                                                                                                                                                                                                                                                                                                                                                                                                                                                                                                                                                                                                                                                                                                                                                                                                                                                                                                                                                                                                                                                                                                                                                                                                                                                                                                                                                                                                                                                                                                                                                                                                                                                                                                                                                                                                                                                                                                                                                                                                                                                                                                                                                                                                                                                                                                                                                                                                                                                                                                                                                                                                                                                                                                                                                                                                                                                                                                                                                                                                                                                                                                                                                    |
| <b>Web of Science</b> | (TI=("Breast neoplasm*" OR "Breast tumor*" OR "Breast carcinoma*" OR "Human mammary neoplasm*" OR "Breast cancer*" OR "Mammary neoplasm*" OR "Mammary cancer*" OR "Mammary carcinoma*" OR "Mammary tumor*" OR "Breast malignant neoplasm*" OR "Breast malignant tumor*" OR "Breast malignant cancer*" OR "Breast malignant carcinoma*")) OR AB=("Breast neoplasm*" OR "Breast tumor*" OR "Breast carcinoma*" OR "Human mammary neoplasm*" OR "Breast cancer*" OR "Mammary neoplasm*" OR "Mammary cancer*" OR "Mammary carcinoma*" OR "Mammary tumor*" OR "Breast malignant neoplasm*" OR "Breast malignant tumor*" OR "Breast malignant cancer*" OR "Breast malignant carcinoma*") AND (TI=("Tamoxifen*" OR "ICI-47699" OR "ICI47699" OR "Nolvadex" OR "Novaldex" OR "Tamoxifen citrate" OR "Tomaxithen" OR "Zitazonium" OR "ICI-46474" OR "ICI46474" OR "ICI-46,474" OR "ICI46,474" OR "Soltamox" OR "Crisafeno" OR "Toremifene" OR "Fareston" OR "FC-1157a" OR "FC1157a" OR "CGS-20267" OR "CGS20267" OR "Femara" OR "Letrozole" OR "Anastrozole" OR "Anastrozole" OR "ICI D1033" OR "ZD-1033" OR "ZD1033" OR "Arimidex" OR "Exemestane" OR "Examestane" OR "FCE 24304" OR "FCE24304" OR "Aromasin" OR "Hormonal antineoplast*" OR "Antineoplastic hormon*" OR "SERM*" OR "Selective estrogen receptor modulator*" OR "Aromatase inhibitor*")) OR AB=("Tamoxifen*" OR "ICI-47699" OR "ICI47699" OR "Nolvadex" OR "Novaldex" OR "Tamoxifen citrate" OR "Tomaxithen" OR "Zitazonium" OR "ICI-46474" OR "ICI46474" OR "ICI-46,474" OR "ICI46,474" OR "Soltamox" OR "Crisafeno" OR "Toremifene" OR "Fareston" OR "FC-1157a" OR "FC1157a" OR "CGS-20267" OR "CGS20267" OR "Femara" OR "Letrozole" OR "Anastrozole" OR "Anastrozole" OR "ICI D1033" OR "ZD-1033" OR "ZD1033" OR "Arimidex" OR "Exemestane" OR "Examestane" OR "FCE 24304" OR "FCE24304" OR "Aromasin" OR "Hormonal antineoplast*" OR "Antineoplastic hormon*" OR "SERM*" OR "Selective estrogen receptor modulator*" OR "Aromatase inhibitor*") AND (TI=("Acute stroke*" OR "Angina" OR "Angor pectoris" OR "Aortic stenosis*" OR "Aortic valve stenosis*" OR "Apoplexy" OR "Arrhythmia" OR "Arrhythmia" OR "Atherogenesis" OR "Atherosclerosis*" OR "Atrial fibrillation*" OR "Auricular fibrillation*" OR "Brain vascular accident*" OR "Cardiac arrhythmia*" OR "Cardiac decompensation*" OR "Cardiac disease*" OR "Cardiac dysrhythmia*" OR "Cardiac event*" OR "Cardiac failure" OR "Cardiomyopathy*" OR "Cardiovascular disease*" OR "Cardiovascular event*" OR "Cardiovascular outcome*" OR "Cardiovascular stroke*" OR "Carditis" OR "Cerebral stroke*" OR "Cerebrovascular accident*" OR "Cerebrovascular apoplexy" OR "Cerebrovascular stroke*" OR "Coronary arteriosclerosis*" OR "Coronary artery disease*" OR "Coronary atherosclerosis*" OR "Embolism*" OR "Embolus" OR "Heart attack*" OR "Heart decompensation*" OR "Heart disease*" OR "Heart event*" OR "Heart failure" OR "Ischaemic heart disease*" OR "Ischemic heart disease*" OR "Major adverse cardiac event*" OR "Myocardial decompensation*" OR "Myocardial disease*" OR "Myocardial failure" OR "Myocardial infarct*" OR "Myocardial ischaemia*" OR "Myocardial ischemia*" OR "Myocardiopathy*" OR "Myocarditis" OR "Myocarditis" OR "Paroxysmal atrial" OR "Peripheral angiopathy*" OR "Peripheral vascular disease*" OR "Stenocardia*" OR "Stroke*" OR "Thromboembolism*" OR "Transient ischaemia*" OR "Transient ischemia*")) OR AB=("Acute stroke*" OR "Angina" OR "Angor pectoris" OR "Aortic stenosis*" OR "Aortic valve stenosis*" OR "Apoplexy" OR "Arrhythmia" OR "Arrhythmia" OR "Atherogenesis" OR "Atherosclerosis*" OR "Atrial fibrillation*" OR "Auricular fibrillation*" OR "Brain vascular accident*" OR "Cardiac arrhythmia*" OR "Cardiac decompensation*" OR "Cardiac disease*" OR "Cardiac dysrhythmia*" OR "Cardiac event*" OR "Cardiac failure" OR "Cardiomyopathy*" OR "Cardiovascular disease*" OR "Cardiovascular event*" OR "Cardiovascular outcome*" OR "Cardiovascular stroke*" OR "Carditis" OR "Cerebral stroke*" OR "Cerebrovascular accident*" OR "Cerebrovascular apoplexy" OR "Cerebrovascular stroke*" OR "Coronary arteriosclerosis*" OR "Coronary artery disease*" OR "Coronary atherosclerosis*" OR "Embolism*" OR "Embolus" OR "Heart attack*" OR "Heart decompensation*" OR "Heart disease*" OR "Heart event*" OR "Heart failure" OR "Ischaemic heart disease*" OR "Ischemic heart disease*" OR "Major adverse cardiac event*" OR "Myocardial decompensation*" OR "Myocardial disease*" OR "Myocardial failure" OR "Myocardial infarct*" OR "Myocardial ischaemia*" OR |

|          |                                                                                                                                                                                                                                                                                                                                                                                                                                                                                                                                                                                                                                                                                                                                                                                                                                                                                                                                                                                                                                                                                                                                                                                                                                                                                                                                                                                                                                                                                                                                                                                                                                                                                                                                                                                                                                                                                                                                                                                                                                                                                                                                                                                                                                                                                                                                                                                                                                                                                                                                                                                                                                                                                                                                                                                                                                                                                                                                                                                                                                                                                                                                                                                                                                                                                                                                                                                                                                                                                                                                                                                                                                                                                                                                                                                                                                                                                                                                                                                                                                                                                                                                                                                                                                                                                                                                                                                                                                |
|----------|--------------------------------------------------------------------------------------------------------------------------------------------------------------------------------------------------------------------------------------------------------------------------------------------------------------------------------------------------------------------------------------------------------------------------------------------------------------------------------------------------------------------------------------------------------------------------------------------------------------------------------------------------------------------------------------------------------------------------------------------------------------------------------------------------------------------------------------------------------------------------------------------------------------------------------------------------------------------------------------------------------------------------------------------------------------------------------------------------------------------------------------------------------------------------------------------------------------------------------------------------------------------------------------------------------------------------------------------------------------------------------------------------------------------------------------------------------------------------------------------------------------------------------------------------------------------------------------------------------------------------------------------------------------------------------------------------------------------------------------------------------------------------------------------------------------------------------------------------------------------------------------------------------------------------------------------------------------------------------------------------------------------------------------------------------------------------------------------------------------------------------------------------------------------------------------------------------------------------------------------------------------------------------------------------------------------------------------------------------------------------------------------------------------------------------------------------------------------------------------------------------------------------------------------------------------------------------------------------------------------------------------------------------------------------------------------------------------------------------------------------------------------------------------------------------------------------------------------------------------------------------------------------------------------------------------------------------------------------------------------------------------------------------------------------------------------------------------------------------------------------------------------------------------------------------------------------------------------------------------------------------------------------------------------------------------------------------------------------------------------------------------------------------------------------------------------------------------------------------------------------------------------------------------------------------------------------------------------------------------------------------------------------------------------------------------------------------------------------------------------------------------------------------------------------------------------------------------------------------------------------------------------------------------------------------------------------------------------------------------------------------------------------------------------------------------------------------------------------------------------------------------------------------------------------------------------------------------------------------------------------------------------------------------------------------------------------------------------------------------------------------------------------------------------------------|
|          | <p>"Myocardial ischemi*" OR "Myocardiopath*" OR "Myocarditides" OR "Myocarditis" OR "Paroxysmal atrial" OR "Peripheral angiopath*" OR "Peripheral vascular disease*" OR "Stenocardia*" OR "Stroke*" OR "Thromboembolism*" OR "Transient ischaemi*" OR "Transient ischemi*")</p>                                                                                                                                                                                                                                                                                                                                                                                                                                                                                                                                                                                                                                                                                                                                                                                                                                                                                                                                                                                                                                                                                                                                                                                                                                                                                                                                                                                                                                                                                                                                                                                                                                                                                                                                                                                                                                                                                                                                                                                                                                                                                                                                                                                                                                                                                                                                                                                                                                                                                                                                                                                                                                                                                                                                                                                                                                                                                                                                                                                                                                                                                                                                                                                                                                                                                                                                                                                                                                                                                                                                                                                                                                                                                                                                                                                                                                                                                                                                                                                                                                                                                                                                                |
| KoreaMed | <p>((("Breast neoplasms"[MH]) OR (((((((((((("Breast neoplasm"[TIAB])) OR ("Breast tumor"[TIAB])) OR ("Breast carcinoma"[TIAB])) OR ("Human mammary neoplasm"[TIAB])) OR ("Breast cancer"[TIAB])) OR ("Mammary neoplasm"[TIAB])) OR ("Mammary cancer"[TIAB])) OR ("Mammary carcinoma"[TIAB])) OR ("Mammary tumor"[TIAB])) OR ("Breast malignant neoplasm"[TIAB])) OR ("Breast malignant tumor"[TIAB])) OR ("Breast malignant cancer"[TIAB])) OR ("Breast malignant carcinoma"[TIAB])) AND (((((((("Tamoxifen"[MH])) OR ("Toremifene"[MH])) OR ("Letrozole"[MH])) OR ("Anastrozole"[MH])) OR ("Antineoplastic agents, hormonal"[MH])) OR ("Selective estrogen receptor modulators"[MH])) OR ("Aromatase inhibitors"[MH])) OR (((((((((((((((("Tamoxifen"[TIAB])) OR ("ICI-47699"[TIAB])) OR ("ICI47699"[TIAB])) OR ("Nolvadex"[TIAB])) OR ("Novaldex"[TIAB])) OR ("Tamoxifen citrate"[TIAB])) OR ("Tomaxithen"[TIAB])) OR ("Zitazonium"[TIAB])) OR ("ICI-46474"[TIAB])) OR ("ICI46474"[TIAB])) OR ("ICI-46,474"[TIAB])) OR ("ICI46,474"[TIAB])) OR ("Soltamox"[TIAB])) OR ("Crisafeno"[TIAB])) OR ("Toremifene"[TIAB])) AND ("Fareston"[TIAB])) AND ("FC-1157a"[TIAB])) OR ("FC1157a"[TIAB])) OR ("CGS-20267"[TIAB])) OR ("CGS20267"[TIAB])) OR ("Femara"[TIAB])) OR ("Letrozole"[TIAB])) OR ("Anastrozole"[TIAB])) OR ("Anastrozole"[TIAB])) OR ("ICI D1033"[TIAB])) OR ("ZD-1033"[TIAB])) OR ("ZD1033"[TIAB])) OR ("Arimidex"[TIAB])) OR ("Exemestane"[TIAB])) OR ("Examestane"[TIAB])) OR ("FCE 24304"[TIAB])) OR ("FCE24304"[TIAB])) OR ("Aromasin"[TIAB])) OR ("Hormonal antineoplast*" [TIAB])) OR ("Antineoplastic hormon*" [TIAB])) OR ("SERM*" [TIAB])) OR ("Selective estrogen receptor modulator*" [TIAB])) OR ("Aromatase inhibitor*" [TIAB])) AND (((((((((((((((("Angina pectoris"[MH])) OR ("Aortic valve stenosis"[MH])) OR ("Arrhythmias, cardiac"[MH])) OR ("Atherosclerosis"[MH])) OR ("Atrial fibrillation"[MH])) OR ("Cardiomyopathies"[MH])) OR ("Cardiovascular diseases"[MH])) OR ("Coronary artery disease"[MH])) OR ("Embolism"[MH])) OR ("Heart failure"[MH])) OR ("Myocardial infarction"[MH])) OR ("Myocardial ischemia"[MH])) OR ("Myocarditis"[MH])) OR ("Peripheral vascular diseases"[MH])) OR ("Stroke"[MH])) OR ("Thromboembolism"[MH])) OR ("Venous thromboembolism"[MH])) OR ("Heart diseases"[MH])) OR (((((((((((((((((((("Acute stroke*" [TIAB])) OR ("Angina"[TIAB])) OR ("Angor pectoris"[TIAB])) OR ("Aortic stenosis*" [TIAB])) OR ("Aortic valve stenosis*" [TIAB])) OR ("Apoplexy"[TIAB])) OR ("Arrhythmia"[TIAB])) OR ("Arrythmia"[TIAB])) OR ("Atherogenesis"[TIAB])) OR ("Atherosclerosis*" [TIAB])) OR ("Atrial fibrillation*" [TIAB])) OR ("Auricular fibrillation*" [TIAB])) OR ("Brain vascular accident*" [TIAB])) OR ("Cardiac arrhythmia*" [TIAB])) OR ("Cardiac decompensation*" [TIAB])) OR ("Cardiac disease*" [TIAB])) OR ("Cardiac dysrhythmia*" [TIAB])) OR ("Cardiac event*" [TIAB])) OR ("Cardiac failure"[TIAB])) OR ("Cardiomyopathy*" [TIAB])) OR ("Cardiovascular disease*" [TIAB])) OR ("Cardiovascular event*" [TIAB])) OR ("Cardiovascular outcome*" [TIAB])) OR ("Cardiovascular stroke*" [TIAB])) OR ("Carditis"[TIAB])) OR ("Cerebral stroke*" [TIAB])) OR ("Cerebrovascular accident*" [TIAB])) OR ("Cerebrovascular apoplexy"[TIAB])) OR ("Cerebrovascular stroke*" [TIAB])) OR ("Coronary arteriosclerosis*" [TIAB])) OR ("Coronary artery disease*" [TIAB])) OR ("Coronary atherosclerosis*" [TIAB])) OR ("Embolism*" [TIAB])) OR ("Embolus"[TIAB])) OR ("Heart attack*" [TIAB])) OR ("Heart decompensation*" [TIAB])) OR ("Heart disease*" [TIAB])) OR ("Heart event*" [TIAB])) OR ("Heart failure"[TIAB])) OR ("Ischaemic heart disease*" [TIAB])) OR ("Ischemic heart disease*" [TIAB])) OR ("Major adverse cardiac event*" [TIAB])) OR ("Myocardial decompensation*" [TIAB])) OR ("Myocardial disease*" [TIAB])) OR ("Myocardial failure"[TIAB])) OR ("Myocardial infarct*" [TIAB])) OR ("Myocardial ischaemi*" [TIAB])) OR ("Myocardial ischemi*" [TIAB])) OR ("Myocardiopath*" [TIAB])) OR ("Myocarditides"[TIAB])) OR ("Myocarditis"[TIAB])) OR ("Paroxysmal atrial"[TIAB])) OR ("Peripheral angiopath*" [TIAB])) OR ("Peripheral vascular disease*" [TIAB])) OR ("Stenocardia*" [TIAB])) OR ("Stroke*" [TIAB])) OR ("Thromboembolism*" [TIAB])) OR ("Transient ischaemi*" [TIAB])) OR ("Transient ischemi*" [TIAB])) Limitation Human</p> |

## 2. Risk of bias

### 1) Randomized controlled study

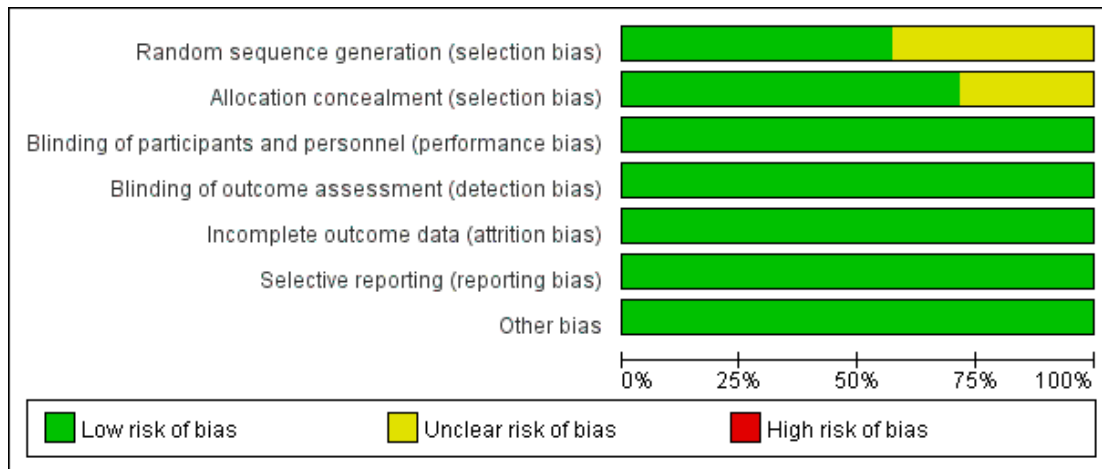

|                  | Random sequence generation (selection bias) | Allocation concealment (selection bias) | Blinding of participants and personnel (performance bias) | Blinding of outcome assessment (detection bias) | Incomplete outcome data (attrition bias) | Selective reporting (reporting bias) | Other bias |
|------------------|---------------------------------------------|-----------------------------------------|-----------------------------------------------------------|-------------------------------------------------|------------------------------------------|--------------------------------------|------------|
| Atalay 2004      | +                                           | +                                       | +                                                         | +                                               | +                                        | +                                    | +          |
| Lonning 2005     | ?                                           | +                                       | +                                                         | +                                               | +                                        | +                                    | +          |
| Markopoulos 2005 | ?                                           | +                                       | +                                                         | +                                               | +                                        | +                                    | +          |
| Markopoulos 2009 | +                                           | ?                                       | +                                                         | +                                               | +                                        | +                                    | +          |
| Rabaglio 2021    | +                                           | +                                       | +                                                         | +                                               | +                                        | +                                    | +          |
| Sawada 2005      | ?                                           | ?                                       | +                                                         | +                                               | +                                        | +                                    | +          |
| Thurlimann 2005  | +                                           | +                                       | +                                                         | +                                               | +                                        | +                                    | +          |

## 2) Non-randomized controlled study

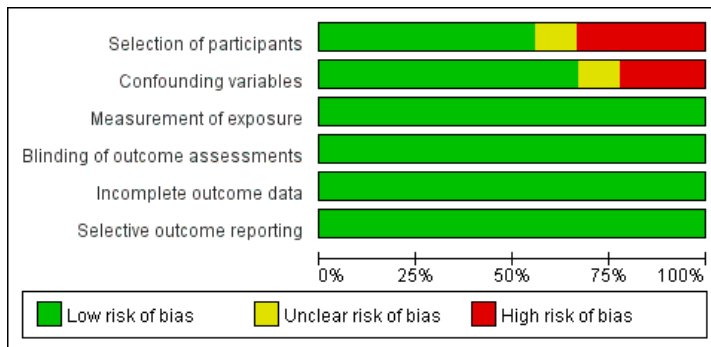

|                       | Selection of participants | Confounding variables | Measurement of exposure | Blinding of outcome assessments | Incomplete outcome data | Selective outcome reporting |
|-----------------------|---------------------------|-----------------------|-------------------------|---------------------------------|-------------------------|-----------------------------|
| Abdel-Qadir 2016      | +                         | +                     | +                       | +                               | +                       | +                           |
| Chang 2022            | -                         | +                     | +                       | +                               | +                       | +                           |
| Choi 2020             | +                         | ?                     | +                       | +                               | +                       | +                           |
| Faiz 2021             | +                         | +                     | +                       | +                               | +                       | +                           |
| Franchi 2021          | -                         | ?                     | +                       | +                               | +                       | +                           |
| Haque 2016            | -                         | +                     | +                       | +                               | +                       | +                           |
| Kamaraju 2019         | -                         | +                     | +                       | +                               | +                       | +                           |
| Khosrow-Khavar 2020   | +                         | +                     | +                       | +                               | +                       | +                           |
| Khosrow-Khavar 2020_2 | -                         | +                     | +                       | +                               | +                       | +                           |
| Ligibel 2012          | +                         | -                     | +                       | +                               | +                       | +                           |
| Matthews 2021         | -                         | +                     | +                       | +                               | +                       | +                           |
| Pineda-Moncusi 2020   | +                         | +                     | +                       | +                               | +                       | +                           |
| Santa-Maria 2016      | +                         | +                     | +                       | +                               | +                       | +                           |
| Seruga 2014           | ?                         | +                     | +                       | +                               | +                       | +                           |
| Sund 2021             | +                         | -                     | +                       | +                               | +                       | +                           |
| Tian 2018             | +                         | -                     | +                       | +                               | +                       | +                           |
| Wojtacki 2001         | +                         | -                     | +                       | +                               | +                       | +                           |
| Xu 2019               | ?                         | +                     | +                       | +                               | +                       | +                           |

## II. Supplementary Figures

Supplementary Figure S1. Forest plots and funnel plots of Table 2

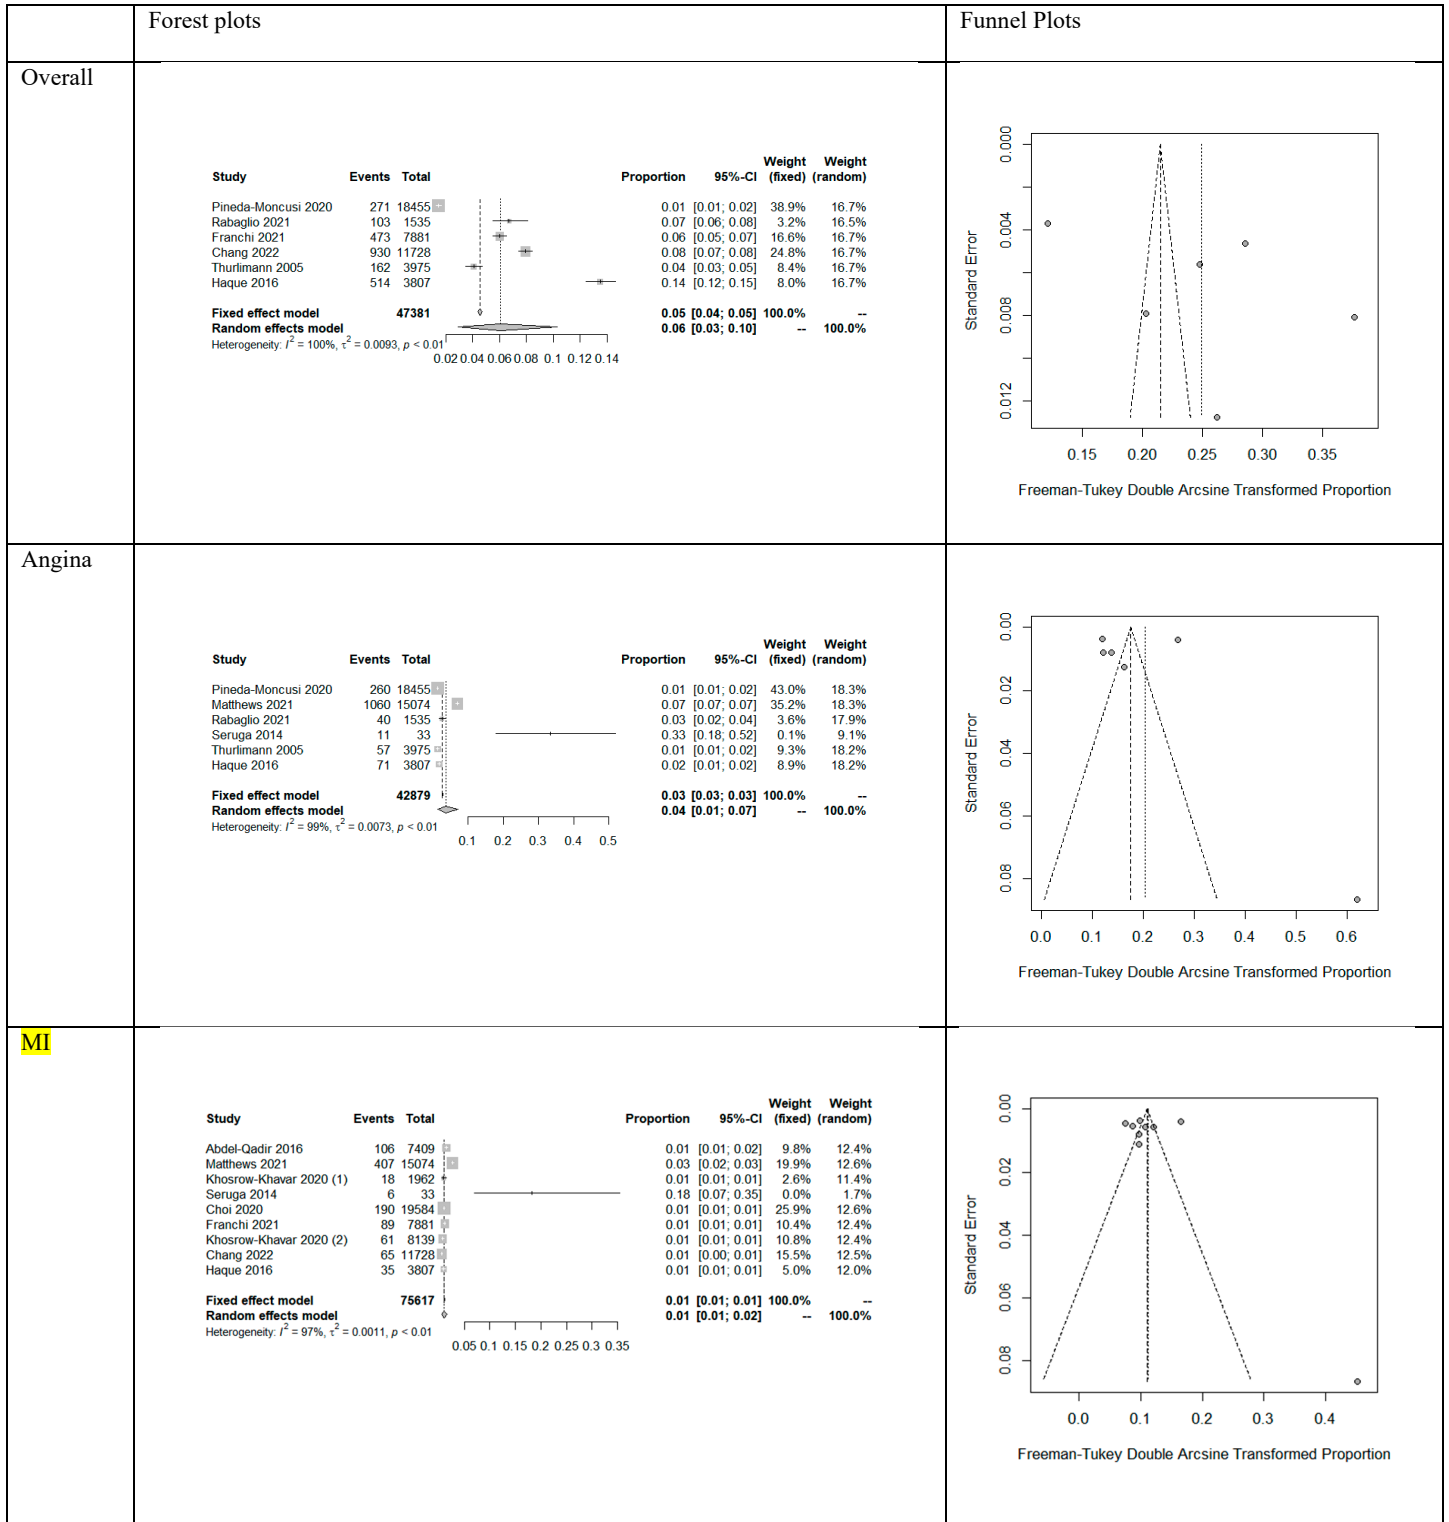

Heart  
failure

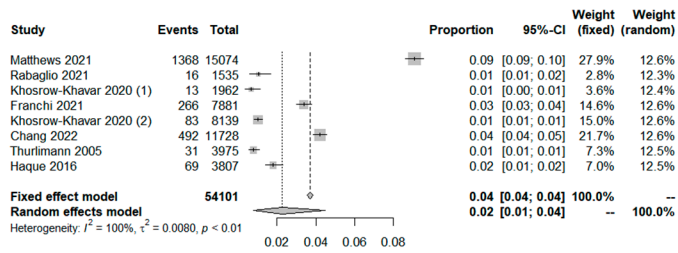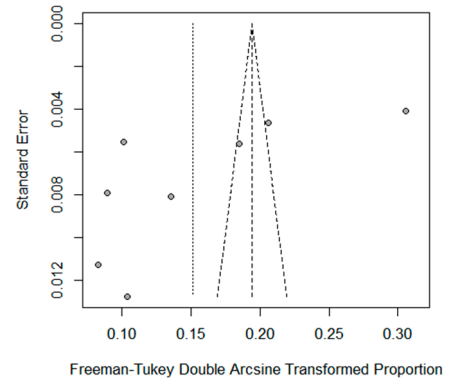

All stroke

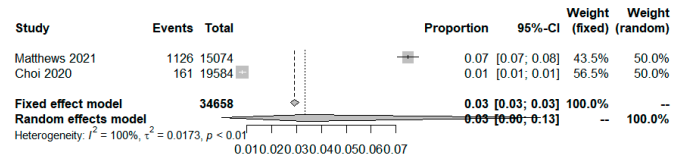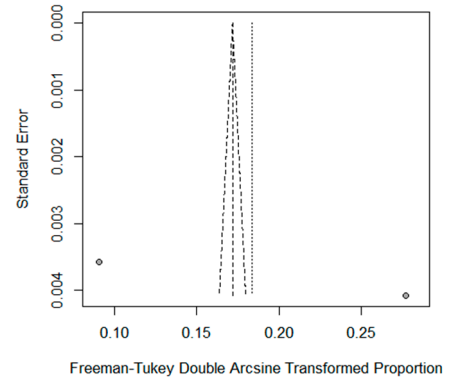

Ischemic  
stroke

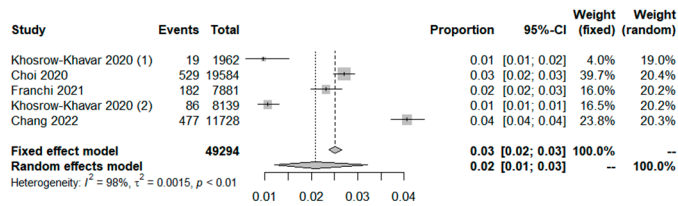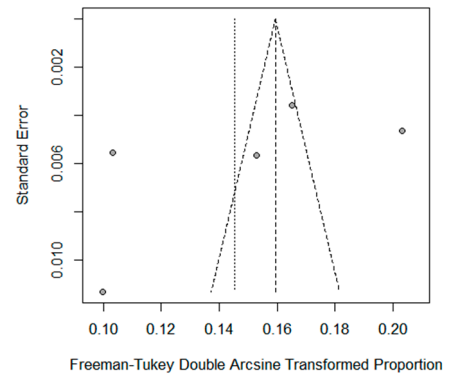

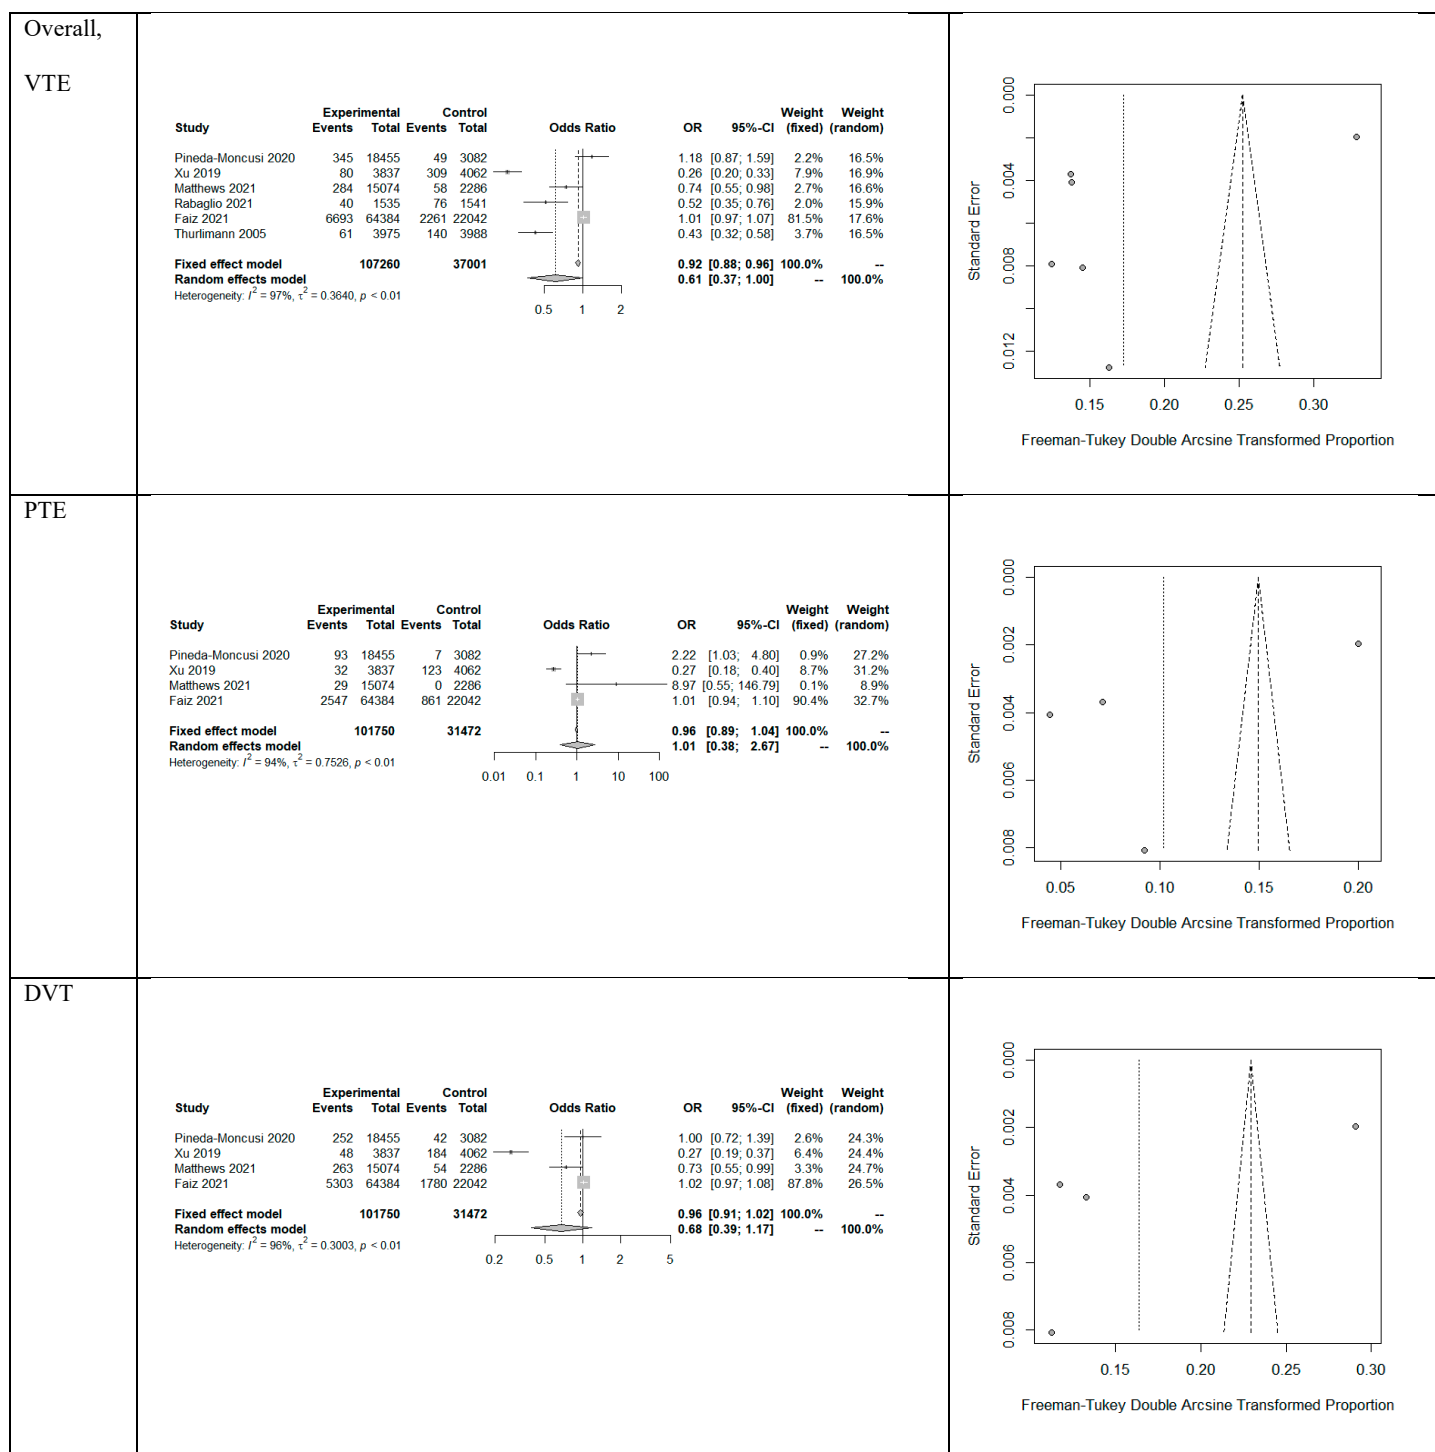

Supplementary Figure S2. Forest plots and funnel plots of Table 3

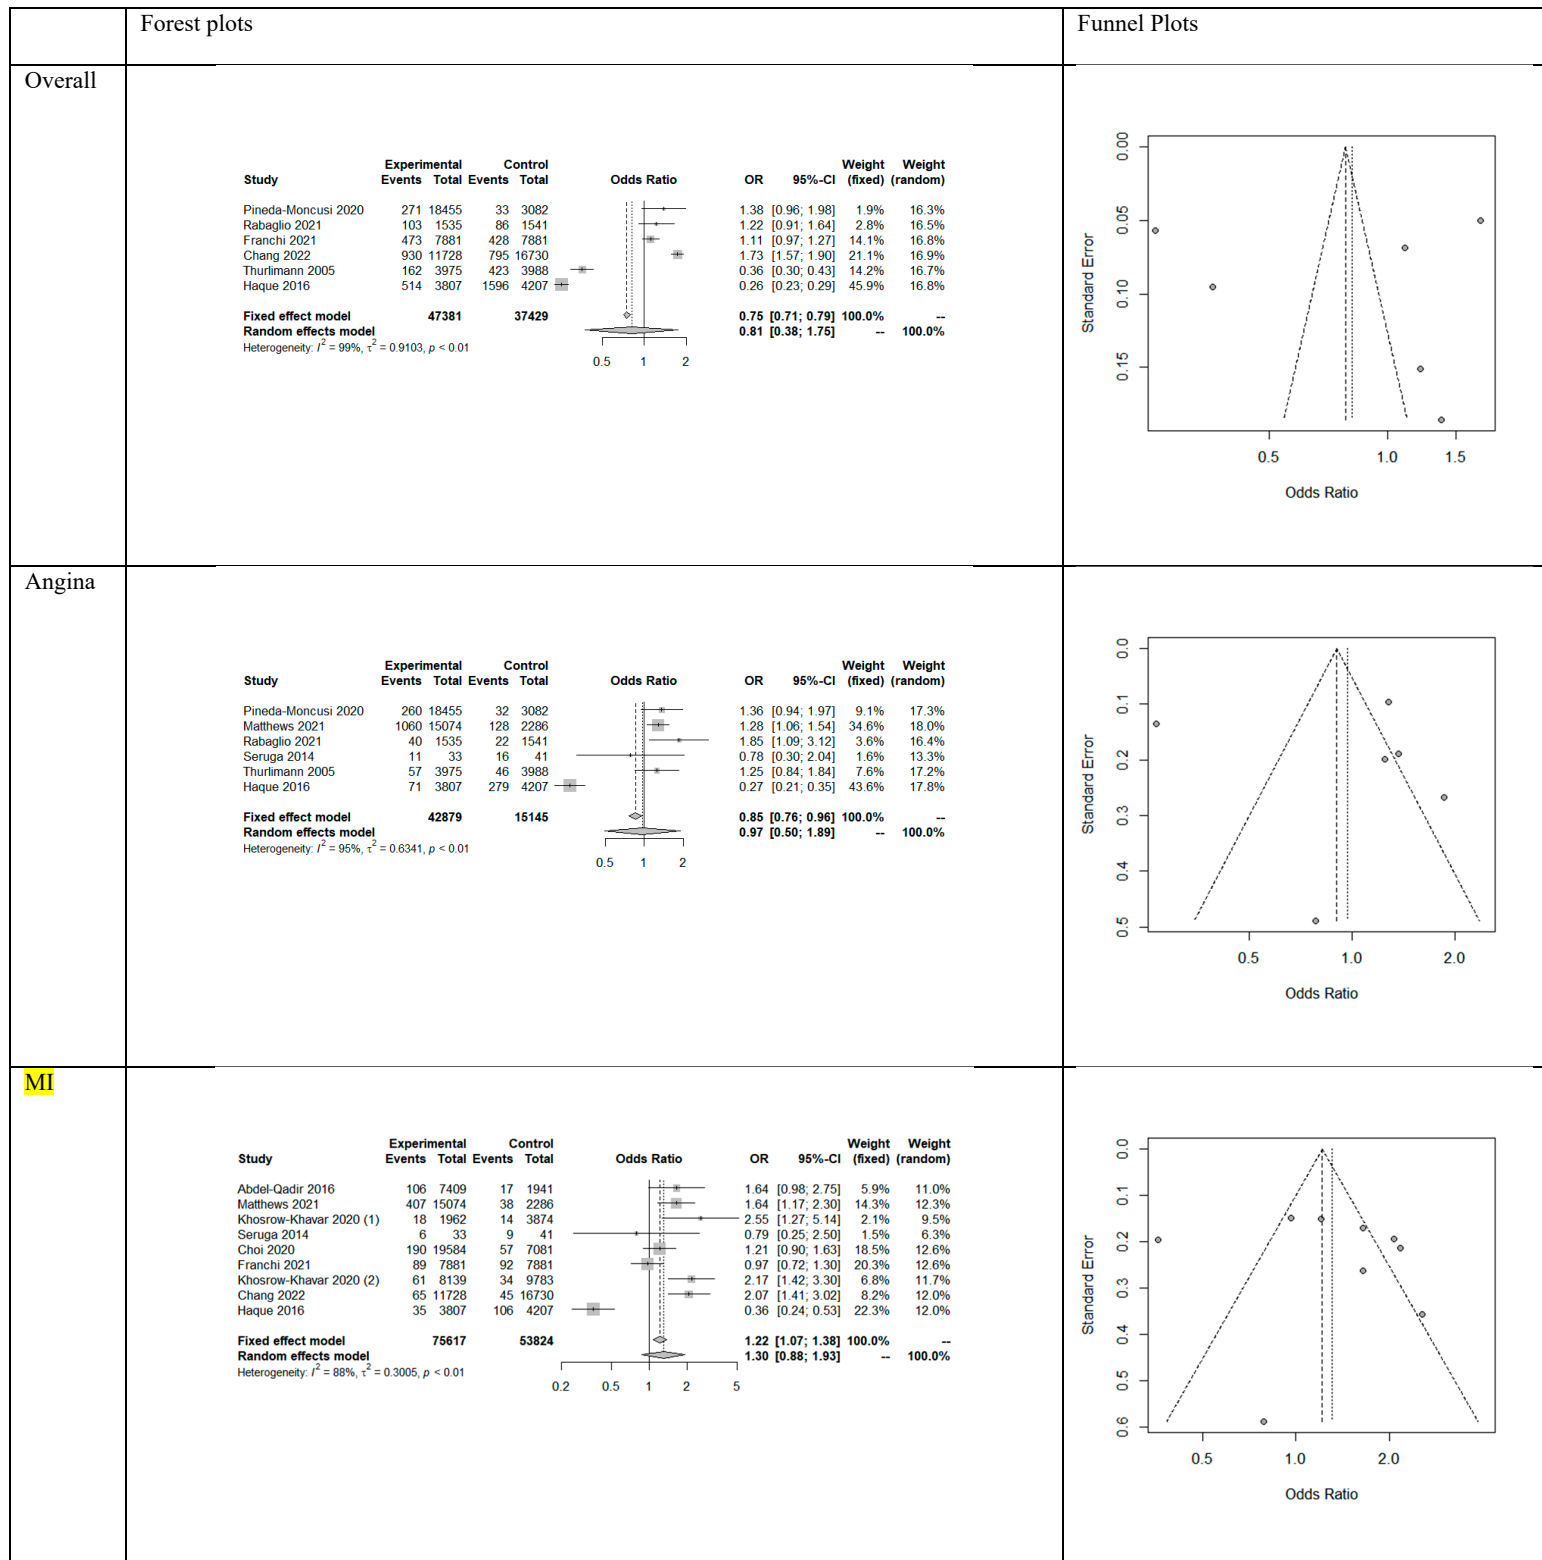



Heart  
failure

| Study                       | Experimental<br>Events | Experimental<br>Total | Control<br>Events | Control<br>Total | Odds Ratio | OR          | 95%-CI              | Weight<br>(fixed) | Weight<br>(random) |
|-----------------------------|------------------------|-----------------------|-------------------|------------------|------------|-------------|---------------------|-------------------|--------------------|
| Matthews 2021               | 1368                   | 15074                 | 233               | 2286             |            | 0.88        | [0.76; 1.02]        | 29.6%             | 14.1%              |
| Rabaglio 2021               | 16                     | 1535                  | 17                | 1541             |            | 0.94        | [0.48; 1.88]        | 1.3%              | 10.6%              |
| Khosrow-Khavar 2020 (1)     | 13                     | 1962                  | 14                | 3874             |            | 1.84        | [0.86; 3.92]        | 0.8%              | 10.0%              |
| Franchi 2021                | 266                    | 7881                  | 243               | 7881             |            | 1.10        | [0.92; 1.31]        | 18.9%             | 14.0%              |
| Khosrow-Khavar 2020 (2)     | 83                     | 8139                  | 33                | 9783             |            | 3.04        | [2.03; 4.56]        | 2.4%              | 12.7%              |
| Chang 2022                  | 492                    | 11728                 | 432               | 16730            |            | 1.65        | [1.45; 1.88]        | 27.4%             | 14.1%              |
| Thurlimann 2005             | 31                     | 3975                  | 14                | 3988             |            | 2.23        | [1.19; 4.20]        | 1.1%              | 11.0%              |
| Haque 2016                  | 69                     | 3807                  | 248               | 4207             |            | 0.29        | [0.22; 0.39]        | 18.6%             | 13.6%              |
| <b>Fixed effect model</b>   |                        | <b>54101</b>          |                   | <b>50290</b>     |            | <b>1.10</b> | <b>[1.02; 1.19]</b> | <b>100.0%</b>     | <b>--</b>          |
| <b>Random effects model</b> |                        |                       |                   |                  |            | <b>1.20</b> | <b>[0.78; 1.86]</b> | <b>--</b>         | <b>100.0%</b>      |

Heterogeneity:  $I^2 = 96\%$ ,  $\tau^2 = 0.3465$ ,  $p < 0.01$

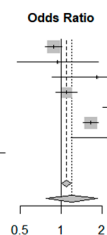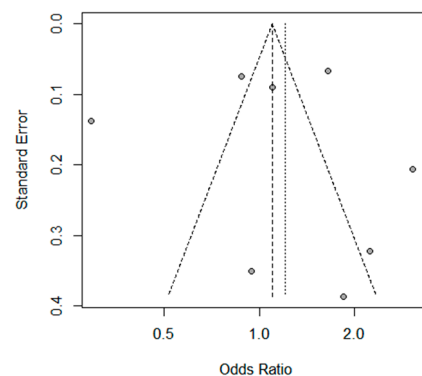

All  
stroke

| Study                       | Experimental<br>Events | Experimental<br>Total | Control<br>Events | Control<br>Total | Odds Ratio | OR          | 95%-CI              | Weight<br>(fixed) | Weight<br>(random) |
|-----------------------------|------------------------|-----------------------|-------------------|------------------|------------|-------------|---------------------|-------------------|--------------------|
| Matthews 2021               | 1126                   | 15074                 | 190               | 2286             |            | 0.89        | [0.76; 1.05]        | 81.7%             | 59.5%              |
| Choi 2020                   | 161                    | 19584                 | 47                | 7081             |            | 1.24        | [0.90; 1.72]        | 18.3%             | 40.5%              |
| <b>Fixed effect model</b>   |                        | <b>34658</b>          |                   | <b>9367</b>      |            | <b>0.95</b> | <b>[0.83; 1.10]</b> | <b>100.0%</b>     | <b>--</b>          |
| <b>Random effects model</b> |                        |                       |                   |                  |            | <b>1.02</b> | <b>[0.74; 1.40]</b> | <b>--</b>         | <b>100.0%</b>      |

Heterogeneity:  $I^2 = 69\%$ ,  $\tau^2 = 0.0378$ ,  $p = 0.07$

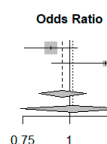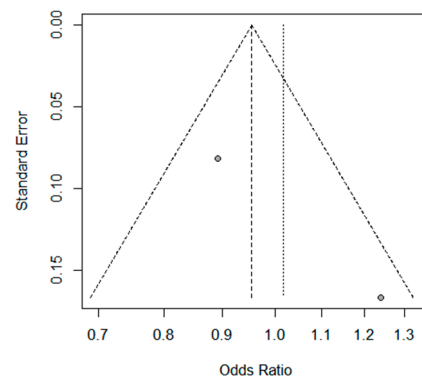

Ischemic  
stroke

| Study                       | Experimental<br>Events | Experimental<br>Total | Control<br>Events | Control<br>Total | Odds Ratio | OR          | 95%-CI              | Weight<br>(fixed) | Weight<br>(random) |
|-----------------------------|------------------------|-----------------------|-------------------|------------------|------------|-------------|---------------------|-------------------|--------------------|
| Khosrow-Khavar 2020 (1)     | 19                     | 1962                  | 22                | 3874             |            | 1.71        | [0.92; 3.17]        | 1.8%              | 10.7%              |
| Choi 2020                   | 529                    | 19584                 | 183               | 7081             |            | 1.05        | [0.88; 1.24]        | 32.3%             | 23.7%              |
| Franchi 2021                | 182                    | 7881                  | 163               | 7881             |            | 1.12        | [0.90; 1.39]        | 19.7%             | 22.4%              |
| Khosrow-Khavar 2020 (2)     | 86                     | 8139                  | 59                | 9783             |            | 1.76        | [1.26; 2.45]        | 6.6%              | 18.5%              |
| Chang 2022                  | 477                    | 11728                 | 406               | 16730            |            | 1.70        | [1.49; 1.95]        | 39.7%             | 24.7%              |
| <b>Fixed effect model</b>   |                        | <b>49294</b>          |                   | <b>45349</b>     |            | <b>1.38</b> | <b>[1.26; 1.51]</b> | <b>100.0%</b>     | <b>--</b>          |
| <b>Random effects model</b> |                        |                       |                   |                  |            | <b>1.39</b> | <b>[1.07; 1.81]</b> | <b>--</b>         | <b>100.0%</b>      |

Heterogeneity:  $I^2 = 85\%$ ,  $\tau^2 = 0.0674$ ,  $p < 0.01$

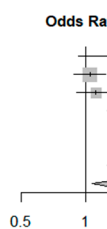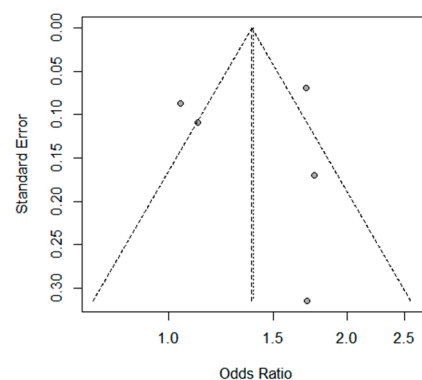

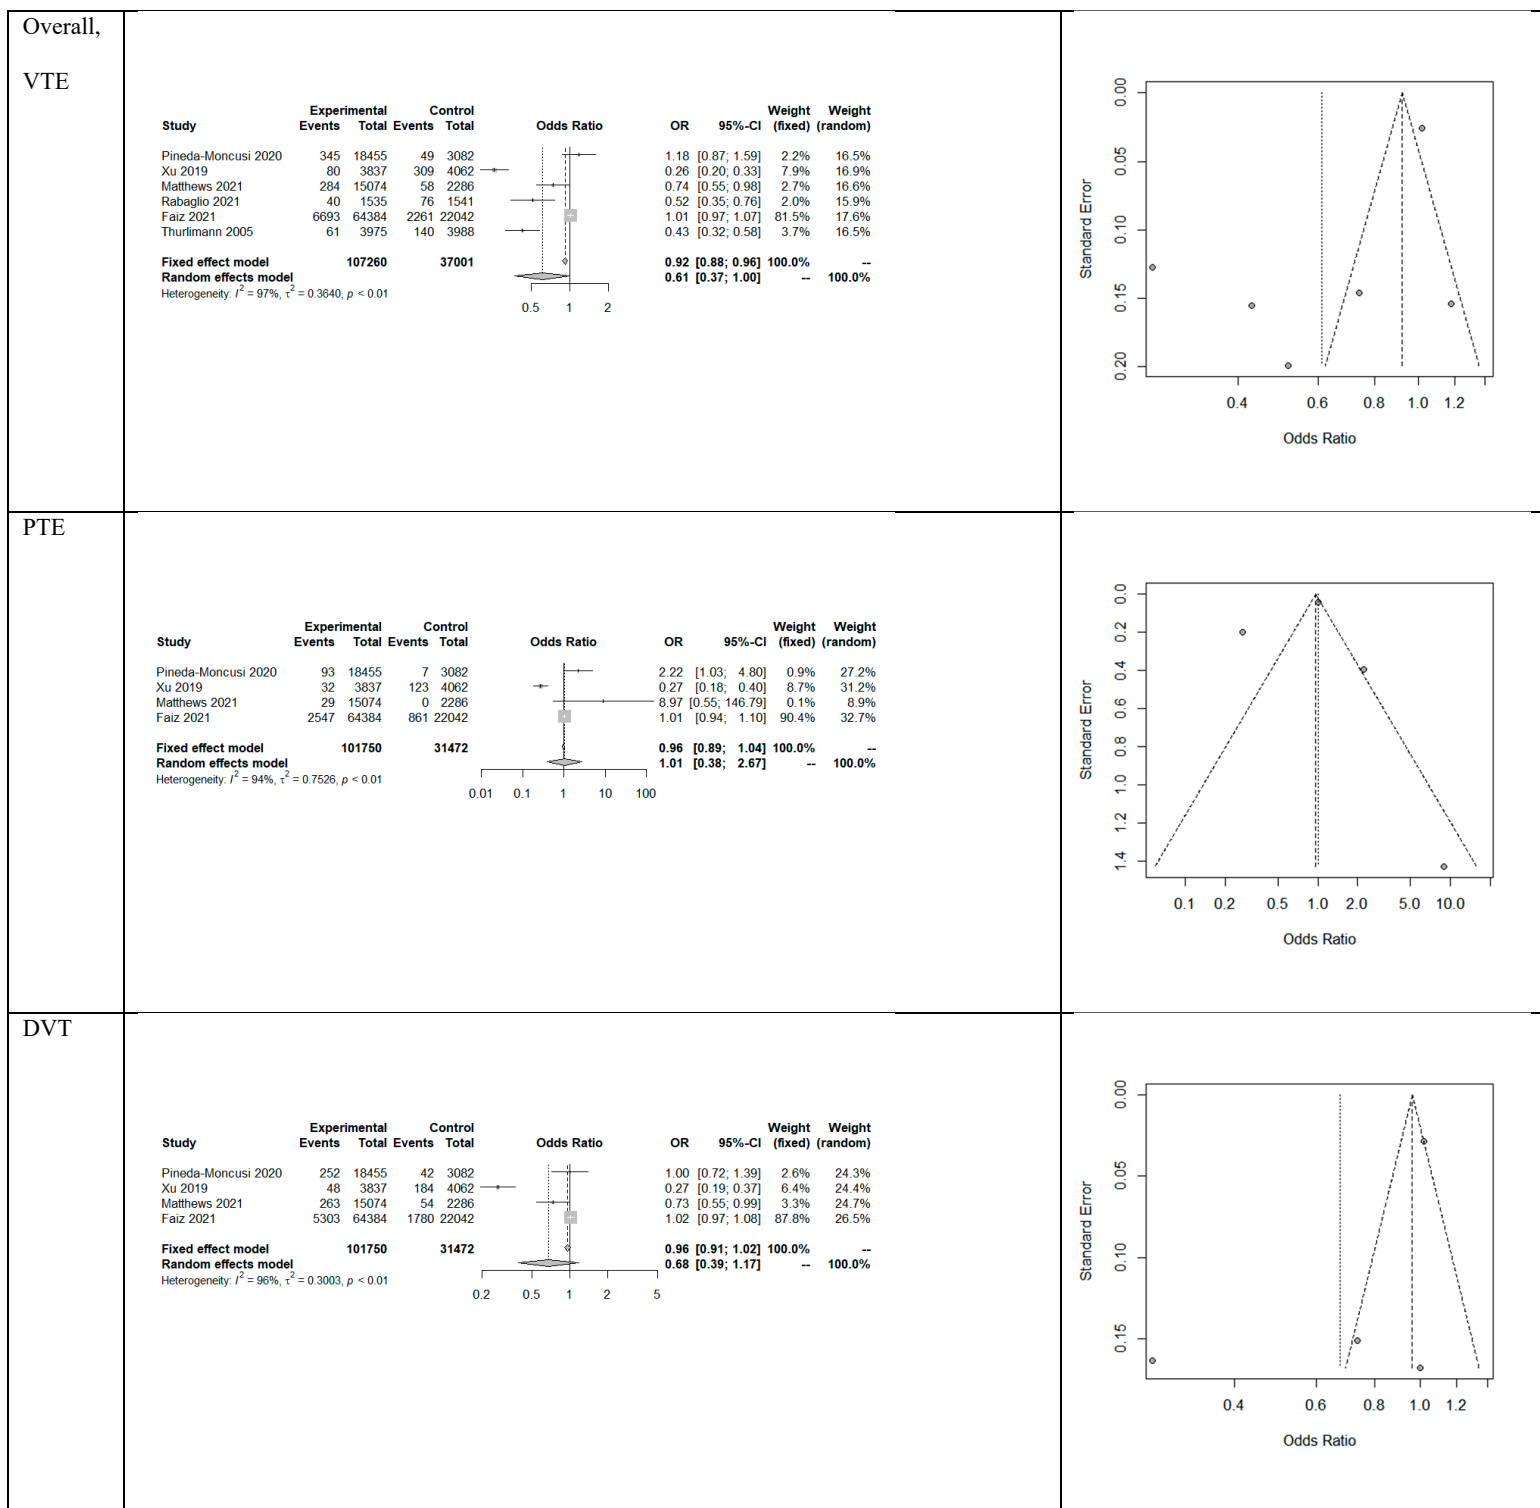

Supplementary Figure S3. Forest plots and funnel plots of Table 4

|                             | Forest plots                                                                                                                                                                                                                                                                                                                                                                                                                                                                                                                                                                                                                                                                                                                                                                                                                                                                                                                                                                                                                                                                                                                                                                                                                                                                                          | Funnel Plots |                 |                             |                 |                |                 |                |                 |                  |       |        |  |       |                |       |       |                  |       |        |  |       |                 |       |       |           |       |        |  |       |                |      |       |                  |       |         |  |       |                 |      |       |                           |       |        |  |                             |                |           |           |                             |  |  |  |                             |               |           |               |                             |  |  |  |                             |           |           |               |  |
|-----------------------------|-------------------------------------------------------------------------------------------------------------------------------------------------------------------------------------------------------------------------------------------------------------------------------------------------------------------------------------------------------------------------------------------------------------------------------------------------------------------------------------------------------------------------------------------------------------------------------------------------------------------------------------------------------------------------------------------------------------------------------------------------------------------------------------------------------------------------------------------------------------------------------------------------------------------------------------------------------------------------------------------------------------------------------------------------------------------------------------------------------------------------------------------------------------------------------------------------------------------------------------------------------------------------------------------------------|--------------|-----------------|-----------------------------|-----------------|----------------|-----------------|----------------|-----------------|------------------|-------|--------|--|-------|----------------|-------|-------|------------------|-------|--------|--|-------|-----------------|-------|-------|-----------|-------|--------|--|-------|----------------|------|-------|------------------|-------|---------|--|-------|-----------------|------|-------|---------------------------|-------|--------|--|-----------------------------|----------------|-----------|-----------|-----------------------------|--|--|--|-----------------------------|---------------|-----------|---------------|-----------------------------|--|--|--|-----------------------------|-----------|-----------|---------------|--|
| Comparison with baseline    |                                                                                                                                                                                                                                                                                                                                                                                                                                                                                                                                                                                                                                                                                                                                                                                                                                                                                                                                                                                                                                                                                                                                                                                                                                                                                                       |              |                 |                             |                 |                |                 |                |                 |                  |       |        |  |       |                |       |       |                  |       |        |  |       |                 |       |       |           |       |        |  |       |                |      |       |                  |       |         |  |       |                 |      |       |                           |       |        |  |                             |                |           |           |                             |  |  |  |                             |               |           |               |                             |  |  |  |                             |           |           |               |  |
| HDL 6-mo                    | <table><thead><tr><th>Study</th><th>TE</th><th>seTE</th><th>Mean Difference</th><th>MD</th><th>95%-CI</th><th>Weight (fixed)</th><th>Weight (random)</th></tr></thead><tbody><tr><td>Atalay 2004</td><td>-2.71</td><td>2.4540</td><td></td><td>-2.71</td><td>[-7.52; 2.10]</td><td>0.2%</td><td>9.6%</td></tr><tr><td>Markopoulos 2009</td><td>-4.30</td><td>0.1239</td><td></td><td>-4.30</td><td>[-4.54; -4.06]</td><td>94.9%</td><td>31.6%</td></tr><tr><td>Tian 2018</td><td>1.93</td><td>2.8614</td><td></td><td>1.93</td><td>[-3.68; 7.54]</td><td>0.2%</td><td>7.7%</td></tr><tr><td>Tian 2018</td><td>-1.93</td><td>0.7493</td><td></td><td>-1.93</td><td>[-3.40; -0.46]</td><td>2.6%</td><td>26.2%</td></tr><tr><td>Markopoulos 2005</td><td>-2.00</td><td>0.8454</td><td></td><td>-2.00</td><td>[-3.66; -0.34]</td><td>2.0%</td><td>24.9%</td></tr><tr><td colspan="4"><b>Fixed effect model</b></td><td><b>-4.18 [-4.41; -3.94]</b></td><td><b>100.0%</b></td><td><b>--</b></td><td><b>--</b></td></tr><tr><td colspan="4"><b>Random effects model</b></td><td><b>-2.47 [-4.26; -0.69]</b></td><td><b>--</b></td><td><b>--</b></td><td><b>100.0%</b></td></tr></tbody></table> <p>Heterogeneity: <math>I^2 = 81\%</math>, <math>\tau^2 = 2.6208</math>, <math>p &lt; 0.01</math></p>       | Study        | TE              | seTE                        | Mean Difference | MD             | 95%-CI          | Weight (fixed) | Weight (random) | Atalay 2004      | -2.71 | 2.4540 |  | -2.71 | [-7.52; 2.10]  | 0.2%  | 9.6%  | Markopoulos 2009 | -4.30 | 0.1239 |  | -4.30 | [-4.54; -4.06]  | 94.9% | 31.6% | Tian 2018 | 1.93  | 2.8614 |  | 1.93  | [-3.68; 7.54]  | 0.2% | 7.7%  | Tian 2018        | -1.93 | 0.7493  |  | -1.93 | [-3.40; -0.46]  | 2.6% | 26.2% | Markopoulos 2005          | -2.00 | 0.8454 |  | -2.00                       | [-3.66; -0.34] | 2.0%      | 24.9%     | <b>Fixed effect model</b>   |  |  |  | <b>-4.18 [-4.41; -3.94]</b> | <b>100.0%</b> | <b>--</b> | <b>--</b>     | <b>Random effects model</b> |  |  |  | <b>-2.47 [-4.26; -0.69]</b> | <b>--</b> | <b>--</b> | <b>100.0%</b> |  |
| Study                       | TE                                                                                                                                                                                                                                                                                                                                                                                                                                                                                                                                                                                                                                                                                                                                                                                                                                                                                                                                                                                                                                                                                                                                                                                                                                                                                                    | seTE         | Mean Difference | MD                          | 95%-CI          | Weight (fixed) | Weight (random) |                |                 |                  |       |        |  |       |                |       |       |                  |       |        |  |       |                 |       |       |           |       |        |  |       |                |      |       |                  |       |         |  |       |                 |      |       |                           |       |        |  |                             |                |           |           |                             |  |  |  |                             |               |           |               |                             |  |  |  |                             |           |           |               |  |
| Atalay 2004                 | -2.71                                                                                                                                                                                                                                                                                                                                                                                                                                                                                                                                                                                                                                                                                                                                                                                                                                                                                                                                                                                                                                                                                                                                                                                                                                                                                                 | 2.4540       |                 | -2.71                       | [-7.52; 2.10]   | 0.2%           | 9.6%            |                |                 |                  |       |        |  |       |                |       |       |                  |       |        |  |       |                 |       |       |           |       |        |  |       |                |      |       |                  |       |         |  |       |                 |      |       |                           |       |        |  |                             |                |           |           |                             |  |  |  |                             |               |           |               |                             |  |  |  |                             |           |           |               |  |
| Markopoulos 2009            | -4.30                                                                                                                                                                                                                                                                                                                                                                                                                                                                                                                                                                                                                                                                                                                                                                                                                                                                                                                                                                                                                                                                                                                                                                                                                                                                                                 | 0.1239       |                 | -4.30                       | [-4.54; -4.06]  | 94.9%          | 31.6%           |                |                 |                  |       |        |  |       |                |       |       |                  |       |        |  |       |                 |       |       |           |       |        |  |       |                |      |       |                  |       |         |  |       |                 |      |       |                           |       |        |  |                             |                |           |           |                             |  |  |  |                             |               |           |               |                             |  |  |  |                             |           |           |               |  |
| Tian 2018                   | 1.93                                                                                                                                                                                                                                                                                                                                                                                                                                                                                                                                                                                                                                                                                                                                                                                                                                                                                                                                                                                                                                                                                                                                                                                                                                                                                                  | 2.8614       |                 | 1.93                        | [-3.68; 7.54]   | 0.2%           | 7.7%            |                |                 |                  |       |        |  |       |                |       |       |                  |       |        |  |       |                 |       |       |           |       |        |  |       |                |      |       |                  |       |         |  |       |                 |      |       |                           |       |        |  |                             |                |           |           |                             |  |  |  |                             |               |           |               |                             |  |  |  |                             |           |           |               |  |
| Tian 2018                   | -1.93                                                                                                                                                                                                                                                                                                                                                                                                                                                                                                                                                                                                                                                                                                                                                                                                                                                                                                                                                                                                                                                                                                                                                                                                                                                                                                 | 0.7493       |                 | -1.93                       | [-3.40; -0.46]  | 2.6%           | 26.2%           |                |                 |                  |       |        |  |       |                |       |       |                  |       |        |  |       |                 |       |       |           |       |        |  |       |                |      |       |                  |       |         |  |       |                 |      |       |                           |       |        |  |                             |                |           |           |                             |  |  |  |                             |               |           |               |                             |  |  |  |                             |           |           |               |  |
| Markopoulos 2005            | -2.00                                                                                                                                                                                                                                                                                                                                                                                                                                                                                                                                                                                                                                                                                                                                                                                                                                                                                                                                                                                                                                                                                                                                                                                                                                                                                                 | 0.8454       |                 | -2.00                       | [-3.66; -0.34]  | 2.0%           | 24.9%           |                |                 |                  |       |        |  |       |                |       |       |                  |       |        |  |       |                 |       |       |           |       |        |  |       |                |      |       |                  |       |         |  |       |                 |      |       |                           |       |        |  |                             |                |           |           |                             |  |  |  |                             |               |           |               |                             |  |  |  |                             |           |           |               |  |
| <b>Fixed effect model</b>   |                                                                                                                                                                                                                                                                                                                                                                                                                                                                                                                                                                                                                                                                                                                                                                                                                                                                                                                                                                                                                                                                                                                                                                                                                                                                                                       |              |                 | <b>-4.18 [-4.41; -3.94]</b> | <b>100.0%</b>   | <b>--</b>      | <b>--</b>       |                |                 |                  |       |        |  |       |                |       |       |                  |       |        |  |       |                 |       |       |           |       |        |  |       |                |      |       |                  |       |         |  |       |                 |      |       |                           |       |        |  |                             |                |           |           |                             |  |  |  |                             |               |           |               |                             |  |  |  |                             |           |           |               |  |
| <b>Random effects model</b> |                                                                                                                                                                                                                                                                                                                                                                                                                                                                                                                                                                                                                                                                                                                                                                                                                                                                                                                                                                                                                                                                                                                                                                                                                                                                                                       |              |                 | <b>-2.47 [-4.26; -0.69]</b> | <b>--</b>       | <b>--</b>      | <b>100.0%</b>   |                |                 |                  |       |        |  |       |                |       |       |                  |       |        |  |       |                 |       |       |           |       |        |  |       |                |      |       |                  |       |         |  |       |                 |      |       |                           |       |        |  |                             |                |           |           |                             |  |  |  |                             |               |           |               |                             |  |  |  |                             |           |           |               |  |
| HDL 12-mo                   | <table><thead><tr><th>Study</th><th>TE</th><th>seTE</th><th>Mean Difference</th><th>MD</th><th>95%-CI</th><th>Weight (fixed)</th><th>Weight (random)</th></tr></thead><tbody><tr><td>Markopoulos 2009</td><td>-3.00</td><td>0.1583</td><td></td><td>-3.00</td><td>[-3.31; -2.69]</td><td>96.2%</td><td>30.7%</td></tr><tr><td>Tian 2018</td><td>5.03</td><td>1.9528</td><td></td><td>5.03</td><td>[1.20; 8.86]</td><td>0.6%</td><td>24.8%</td></tr><tr><td>Tian 2018</td><td>2.32</td><td>0.9007</td><td></td><td>2.32</td><td>[0.55; 4.09]</td><td>3.0%</td><td>29.3%</td></tr><tr><td>Markopoulos 2005</td><td>1.00</td><td>4.0505</td><td></td><td>1.00</td><td>[-6.94; 8.94]</td><td>0.1%</td><td>15.1%</td></tr><tr><td colspan="4"><b>Fixed effect model</b></td><td><b>-2.79 [-3.09; -2.48]</b></td><td><b>100.0%</b></td><td><b>--</b></td><td><b>--</b></td></tr><tr><td colspan="4"><b>Random effects model</b></td><td><b>1.16 [-3.18; 5.49]</b></td><td><b>--</b></td><td><b>--</b></td><td><b>100.0%</b></td></tr></tbody></table> <p>Heterogeneity: <math>I^2 = 94\%</math>, <math>\tau^2 = 15.8737</math>, <math>p &lt; 0.01</math></p>                                                                                                                                                | Study        | TE              | seTE                        | Mean Difference | MD             | 95%-CI          | Weight (fixed) | Weight (random) | Markopoulos 2009 | -3.00 | 0.1583 |  | -3.00 | [-3.31; -2.69] | 96.2% | 30.7% | Tian 2018        | 5.03  | 1.9528 |  | 5.03  | [1.20; 8.86]    | 0.6%  | 24.8% | Tian 2018 | 2.32  | 0.9007 |  | 2.32  | [0.55; 4.09]   | 3.0% | 29.3% | Markopoulos 2005 | 1.00  | 4.0505  |  | 1.00  | [-6.94; 8.94]   | 0.1% | 15.1% | <b>Fixed effect model</b> |       |        |  | <b>-2.79 [-3.09; -2.48]</b> | <b>100.0%</b>  | <b>--</b> | <b>--</b> | <b>Random effects model</b> |  |  |  | <b>1.16 [-3.18; 5.49]</b>   | <b>--</b>     | <b>--</b> | <b>100.0%</b> |                             |  |  |  |                             |           |           |               |  |
| Study                       | TE                                                                                                                                                                                                                                                                                                                                                                                                                                                                                                                                                                                                                                                                                                                                                                                                                                                                                                                                                                                                                                                                                                                                                                                                                                                                                                    | seTE         | Mean Difference | MD                          | 95%-CI          | Weight (fixed) | Weight (random) |                |                 |                  |       |        |  |       |                |       |       |                  |       |        |  |       |                 |       |       |           |       |        |  |       |                |      |       |                  |       |         |  |       |                 |      |       |                           |       |        |  |                             |                |           |           |                             |  |  |  |                             |               |           |               |                             |  |  |  |                             |           |           |               |  |
| Markopoulos 2009            | -3.00                                                                                                                                                                                                                                                                                                                                                                                                                                                                                                                                                                                                                                                                                                                                                                                                                                                                                                                                                                                                                                                                                                                                                                                                                                                                                                 | 0.1583       |                 | -3.00                       | [-3.31; -2.69]  | 96.2%          | 30.7%           |                |                 |                  |       |        |  |       |                |       |       |                  |       |        |  |       |                 |       |       |           |       |        |  |       |                |      |       |                  |       |         |  |       |                 |      |       |                           |       |        |  |                             |                |           |           |                             |  |  |  |                             |               |           |               |                             |  |  |  |                             |           |           |               |  |
| Tian 2018                   | 5.03                                                                                                                                                                                                                                                                                                                                                                                                                                                                                                                                                                                                                                                                                                                                                                                                                                                                                                                                                                                                                                                                                                                                                                                                                                                                                                  | 1.9528       |                 | 5.03                        | [1.20; 8.86]    | 0.6%           | 24.8%           |                |                 |                  |       |        |  |       |                |       |       |                  |       |        |  |       |                 |       |       |           |       |        |  |       |                |      |       |                  |       |         |  |       |                 |      |       |                           |       |        |  |                             |                |           |           |                             |  |  |  |                             |               |           |               |                             |  |  |  |                             |           |           |               |  |
| Tian 2018                   | 2.32                                                                                                                                                                                                                                                                                                                                                                                                                                                                                                                                                                                                                                                                                                                                                                                                                                                                                                                                                                                                                                                                                                                                                                                                                                                                                                  | 0.9007       |                 | 2.32                        | [0.55; 4.09]    | 3.0%           | 29.3%           |                |                 |                  |       |        |  |       |                |       |       |                  |       |        |  |       |                 |       |       |           |       |        |  |       |                |      |       |                  |       |         |  |       |                 |      |       |                           |       |        |  |                             |                |           |           |                             |  |  |  |                             |               |           |               |                             |  |  |  |                             |           |           |               |  |
| Markopoulos 2005            | 1.00                                                                                                                                                                                                                                                                                                                                                                                                                                                                                                                                                                                                                                                                                                                                                                                                                                                                                                                                                                                                                                                                                                                                                                                                                                                                                                  | 4.0505       |                 | 1.00                        | [-6.94; 8.94]   | 0.1%           | 15.1%           |                |                 |                  |       |        |  |       |                |       |       |                  |       |        |  |       |                 |       |       |           |       |        |  |       |                |      |       |                  |       |         |  |       |                 |      |       |                           |       |        |  |                             |                |           |           |                             |  |  |  |                             |               |           |               |                             |  |  |  |                             |           |           |               |  |
| <b>Fixed effect model</b>   |                                                                                                                                                                                                                                                                                                                                                                                                                                                                                                                                                                                                                                                                                                                                                                                                                                                                                                                                                                                                                                                                                                                                                                                                                                                                                                       |              |                 | <b>-2.79 [-3.09; -2.48]</b> | <b>100.0%</b>   | <b>--</b>      | <b>--</b>       |                |                 |                  |       |        |  |       |                |       |       |                  |       |        |  |       |                 |       |       |           |       |        |  |       |                |      |       |                  |       |         |  |       |                 |      |       |                           |       |        |  |                             |                |           |           |                             |  |  |  |                             |               |           |               |                             |  |  |  |                             |           |           |               |  |
| <b>Random effects model</b> |                                                                                                                                                                                                                                                                                                                                                                                                                                                                                                                                                                                                                                                                                                                                                                                                                                                                                                                                                                                                                                                                                                                                                                                                                                                                                                       |              |                 | <b>1.16 [-3.18; 5.49]</b>   | <b>--</b>       | <b>--</b>      | <b>100.0%</b>   |                |                 |                  |       |        |  |       |                |       |       |                  |       |        |  |       |                 |       |       |           |       |        |  |       |                |      |       |                  |       |         |  |       |                 |      |       |                           |       |        |  |                             |                |           |           |                             |  |  |  |                             |               |           |               |                             |  |  |  |                             |           |           |               |  |
| LDL 6-mo                    | <table><thead><tr><th>Study</th><th>TE</th><th>seTE</th><th>Mean Difference</th><th>MD</th><th>95%-CI</th><th>Weight (fixed)</th><th>Weight (random)</th></tr></thead><tbody><tr><td>Markopoulos 2009</td><td>24.30</td><td>0.4337</td><td></td><td>24.30</td><td>[23.45; 25.15]</td><td>98.6%</td><td>26.6%</td></tr><tr><td>Tian 2018</td><td>6.57</td><td>9.7407</td><td></td><td>6.57</td><td>[-12.52; 25.66]</td><td>0.2%</td><td>17.3%</td></tr><tr><td>Tian 2018</td><td>-4.25</td><td>6.3011</td><td></td><td>-4.25</td><td>[-16.60; 8.10]</td><td>0.5%</td><td>21.7%</td></tr><tr><td>Tian 2018</td><td>10.25</td><td>15.1967</td><td></td><td>10.25</td><td>[-19.53; 40.03]</td><td>0.1%</td><td>11.5%</td></tr><tr><td>Markopoulos 2005</td><td>11.50</td><td>5.4243</td><td></td><td>11.50</td><td>[0.87; 22.13]</td><td>0.6%</td><td>22.8%</td></tr><tr><td colspan="4"><b>Fixed effect model</b></td><td><b>24.04 [23.20; 24.88]</b></td><td><b>100.0%</b></td><td><b>--</b></td><td><b>--</b></td></tr><tr><td colspan="4"><b>Random effects model</b></td><td><b>10.48 [-2.95; 23.92]</b></td><td><b>--</b></td><td><b>--</b></td><td><b>100.0%</b></td></tr></tbody></table> <p>Heterogeneity: <math>I^2 = 87\%</math>, <math>\tau^2 = 176.5458</math>, <math>p &lt; 0.01</math></p> | Study        | TE              | seTE                        | Mean Difference | MD             | 95%-CI          | Weight (fixed) | Weight (random) | Markopoulos 2009 | 24.30 | 0.4337 |  | 24.30 | [23.45; 25.15] | 98.6% | 26.6% | Tian 2018        | 6.57  | 9.7407 |  | 6.57  | [-12.52; 25.66] | 0.2%  | 17.3% | Tian 2018 | -4.25 | 6.3011 |  | -4.25 | [-16.60; 8.10] | 0.5% | 21.7% | Tian 2018        | 10.25 | 15.1967 |  | 10.25 | [-19.53; 40.03] | 0.1% | 11.5% | Markopoulos 2005          | 11.50 | 5.4243 |  | 11.50                       | [0.87; 22.13]  | 0.6%      | 22.8%     | <b>Fixed effect model</b>   |  |  |  | <b>24.04 [23.20; 24.88]</b> | <b>100.0%</b> | <b>--</b> | <b>--</b>     | <b>Random effects model</b> |  |  |  | <b>10.48 [-2.95; 23.92]</b> | <b>--</b> | <b>--</b> | <b>100.0%</b> |  |
| Study                       | TE                                                                                                                                                                                                                                                                                                                                                                                                                                                                                                                                                                                                                                                                                                                                                                                                                                                                                                                                                                                                                                                                                                                                                                                                                                                                                                    | seTE         | Mean Difference | MD                          | 95%-CI          | Weight (fixed) | Weight (random) |                |                 |                  |       |        |  |       |                |       |       |                  |       |        |  |       |                 |       |       |           |       |        |  |       |                |      |       |                  |       |         |  |       |                 |      |       |                           |       |        |  |                             |                |           |           |                             |  |  |  |                             |               |           |               |                             |  |  |  |                             |           |           |               |  |
| Markopoulos 2009            | 24.30                                                                                                                                                                                                                                                                                                                                                                                                                                                                                                                                                                                                                                                                                                                                                                                                                                                                                                                                                                                                                                                                                                                                                                                                                                                                                                 | 0.4337       |                 | 24.30                       | [23.45; 25.15]  | 98.6%          | 26.6%           |                |                 |                  |       |        |  |       |                |       |       |                  |       |        |  |       |                 |       |       |           |       |        |  |       |                |      |       |                  |       |         |  |       |                 |      |       |                           |       |        |  |                             |                |           |           |                             |  |  |  |                             |               |           |               |                             |  |  |  |                             |           |           |               |  |
| Tian 2018                   | 6.57                                                                                                                                                                                                                                                                                                                                                                                                                                                                                                                                                                                                                                                                                                                                                                                                                                                                                                                                                                                                                                                                                                                                                                                                                                                                                                  | 9.7407       |                 | 6.57                        | [-12.52; 25.66] | 0.2%           | 17.3%           |                |                 |                  |       |        |  |       |                |       |       |                  |       |        |  |       |                 |       |       |           |       |        |  |       |                |      |       |                  |       |         |  |       |                 |      |       |                           |       |        |  |                             |                |           |           |                             |  |  |  |                             |               |           |               |                             |  |  |  |                             |           |           |               |  |
| Tian 2018                   | -4.25                                                                                                                                                                                                                                                                                                                                                                                                                                                                                                                                                                                                                                                                                                                                                                                                                                                                                                                                                                                                                                                                                                                                                                                                                                                                                                 | 6.3011       |                 | -4.25                       | [-16.60; 8.10]  | 0.5%           | 21.7%           |                |                 |                  |       |        |  |       |                |       |       |                  |       |        |  |       |                 |       |       |           |       |        |  |       |                |      |       |                  |       |         |  |       |                 |      |       |                           |       |        |  |                             |                |           |           |                             |  |  |  |                             |               |           |               |                             |  |  |  |                             |           |           |               |  |
| Tian 2018                   | 10.25                                                                                                                                                                                                                                                                                                                                                                                                                                                                                                                                                                                                                                                                                                                                                                                                                                                                                                                                                                                                                                                                                                                                                                                                                                                                                                 | 15.1967      |                 | 10.25                       | [-19.53; 40.03] | 0.1%           | 11.5%           |                |                 |                  |       |        |  |       |                |       |       |                  |       |        |  |       |                 |       |       |           |       |        |  |       |                |      |       |                  |       |         |  |       |                 |      |       |                           |       |        |  |                             |                |           |           |                             |  |  |  |                             |               |           |               |                             |  |  |  |                             |           |           |               |  |
| Markopoulos 2005            | 11.50                                                                                                                                                                                                                                                                                                                                                                                                                                                                                                                                                                                                                                                                                                                                                                                                                                                                                                                                                                                                                                                                                                                                                                                                                                                                                                 | 5.4243       |                 | 11.50                       | [0.87; 22.13]   | 0.6%           | 22.8%           |                |                 |                  |       |        |  |       |                |       |       |                  |       |        |  |       |                 |       |       |           |       |        |  |       |                |      |       |                  |       |         |  |       |                 |      |       |                           |       |        |  |                             |                |           |           |                             |  |  |  |                             |               |           |               |                             |  |  |  |                             |           |           |               |  |
| <b>Fixed effect model</b>   |                                                                                                                                                                                                                                                                                                                                                                                                                                                                                                                                                                                                                                                                                                                                                                                                                                                                                                                                                                                                                                                                                                                                                                                                                                                                                                       |              |                 | <b>24.04 [23.20; 24.88]</b> | <b>100.0%</b>   | <b>--</b>      | <b>--</b>       |                |                 |                  |       |        |  |       |                |       |       |                  |       |        |  |       |                 |       |       |           |       |        |  |       |                |      |       |                  |       |         |  |       |                 |      |       |                           |       |        |  |                             |                |           |           |                             |  |  |  |                             |               |           |               |                             |  |  |  |                             |           |           |               |  |
| <b>Random effects model</b> |                                                                                                                                                                                                                                                                                                                                                                                                                                                                                                                                                                                                                                                                                                                                                                                                                                                                                                                                                                                                                                                                                                                                                                                                                                                                                                       |              |                 | <b>10.48 [-2.95; 23.92]</b> | <b>--</b>       | <b>--</b>      | <b>100.0%</b>   |                |                 |                  |       |        |  |       |                |       |       |                  |       |        |  |       |                 |       |       |           |       |        |  |       |                |      |       |                  |       |         |  |       |                 |      |       |                           |       |        |  |                             |                |           |           |                             |  |  |  |                             |               |           |               |                             |  |  |  |                             |           |           |               |  |

| LDL 12-mo            | <table><tr><th>Study</th><th>TE</th><th>seTE</th><th>Mean Difference</th><th>MD</th><th>95%-CI</th><th>Weight (fixed)</th><th>Weight (random)</th></tr><tr><td>Markopoulos 2009</td><td>20.10</td><td>0.4337</td><td></td><td>20.10</td><td>[ 19.25; 20.95]</td><td>98.3%</td><td>25.1%</td></tr><tr><td>Tian 2018</td><td>5.80</td><td>8.5991</td><td></td><td>5.80</td><td>[-11.05; 22.65]</td><td>0.3%</td><td>16.5%</td></tr><tr><td>Tian 2018</td><td>-3.48</td><td>5.1595</td><td></td><td>-3.48</td><td>[-13.59; 6.63]</td><td>0.7%</td><td>21.2%</td></tr><tr><td>Tian 2018</td><td>4.91</td><td>7.2796</td><td></td><td>4.91</td><td>[-9.36; 19.18]</td><td>0.3%</td><td>18.3%</td></tr><tr><td>Markopoulos 2005</td><td>10.00</td><td>6.8785</td><td></td><td>10.00</td><td>[-3.48; 23.48]</td><td>0.4%</td><td>18.9%</td></tr><tr><td>Fixed effect model</td><td></td><td></td><td></td><td>19.81</td><td>[ 18.97; 20.65]</td><td>100.0%</td><td>--</td></tr><tr><td>Random effects model</td><td></td><td></td><td></td><td>8.05</td><td>[ -3.68; 19.79]</td><td>--</td><td>100.0%</td></tr></table> <p>Heterogeneity: <math>I^2 = 87\%</math>, <math>\tau^2 = 142.6174</math>, <math>p &lt; 0.01</math></p>                                                                                                                                                            | Study   | TE              | seTE   | Mean Difference   | MD             | 95%-CI          | Weight (fixed) | Weight (random) | Markopoulos 2009 | 20.10  | 0.4337 |  | 20.10  | [ 19.25; 20.95]  | 98.3% | 25.1% | Tian 2018        | 5.80   | 8.5991 |  | 5.80   | [-11.05; 22.65]  | 0.3%  | 16.5% | Tian 2018 | -3.48  | 5.1595  |  | -3.48  | [-13.59; 6.63]  | 0.7% | 21.2% | Tian 2018 | 4.91   | 7.2796  |  | 4.91   | [-9.36; 19.18]   | 0.3% | 18.3% | Markopoulos 2005 | 10.00  | 6.8785  |  | 10.00  | [-3.48; 23.48]    | 0.4% | 18.9% | Fixed effect model |        |         |  | 19.81  | [ 18.97; 20.65]  | 100.0% | --    | Random effects model |  |  |  | 8.05   | [ -3.68; 19.79]  | --     | 100.0% |                      |  |  |  |        |                |    |        |  |
|----------------------|-------------------------------------------------------------------------------------------------------------------------------------------------------------------------------------------------------------------------------------------------------------------------------------------------------------------------------------------------------------------------------------------------------------------------------------------------------------------------------------------------------------------------------------------------------------------------------------------------------------------------------------------------------------------------------------------------------------------------------------------------------------------------------------------------------------------------------------------------------------------------------------------------------------------------------------------------------------------------------------------------------------------------------------------------------------------------------------------------------------------------------------------------------------------------------------------------------------------------------------------------------------------------------------------------------------------------------------------------------------------------------------|---------|-----------------|--------|-------------------|----------------|-----------------|----------------|-----------------|------------------|--------|--------|--|--------|------------------|-------|-------|------------------|--------|--------|--|--------|------------------|-------|-------|-----------|--------|---------|--|--------|-----------------|------|-------|-----------|--------|---------|--|--------|------------------|------|-------|------------------|--------|---------|--|--------|-------------------|------|-------|--------------------|--------|---------|--|--------|------------------|--------|-------|----------------------|--|--|--|--------|------------------|--------|--------|----------------------|--|--|--|--------|----------------|----|--------|--|
| Study                | TE                                                                                                                                                                                                                                                                                                                                                                                                                                                                                                                                                                                                                                                                                                                                                                                                                                                                                                                                                                                                                                                                                                                                                                                                                                                                                                                                                                                  | seTE    | Mean Difference | MD     | 95%-CI            | Weight (fixed) | Weight (random) |                |                 |                  |        |        |  |        |                  |       |       |                  |        |        |  |        |                  |       |       |           |        |         |  |        |                 |      |       |           |        |         |  |        |                  |      |       |                  |        |         |  |        |                   |      |       |                    |        |         |  |        |                  |        |       |                      |  |  |  |        |                  |        |        |                      |  |  |  |        |                |    |        |  |
| Markopoulos 2009     | 20.10                                                                                                                                                                                                                                                                                                                                                                                                                                                                                                                                                                                                                                                                                                                                                                                                                                                                                                                                                                                                                                                                                                                                                                                                                                                                                                                                                                               | 0.4337  |                 | 20.10  | [ 19.25; 20.95]   | 98.3%          | 25.1%           |                |                 |                  |        |        |  |        |                  |       |       |                  |        |        |  |        |                  |       |       |           |        |         |  |        |                 |      |       |           |        |         |  |        |                  |      |       |                  |        |         |  |        |                   |      |       |                    |        |         |  |        |                  |        |       |                      |  |  |  |        |                  |        |        |                      |  |  |  |        |                |    |        |  |
| Tian 2018            | 5.80                                                                                                                                                                                                                                                                                                                                                                                                                                                                                                                                                                                                                                                                                                                                                                                                                                                                                                                                                                                                                                                                                                                                                                                                                                                                                                                                                                                | 8.5991  |                 | 5.80   | [-11.05; 22.65]   | 0.3%           | 16.5%           |                |                 |                  |        |        |  |        |                  |       |       |                  |        |        |  |        |                  |       |       |           |        |         |  |        |                 |      |       |           |        |         |  |        |                  |      |       |                  |        |         |  |        |                   |      |       |                    |        |         |  |        |                  |        |       |                      |  |  |  |        |                  |        |        |                      |  |  |  |        |                |    |        |  |
| Tian 2018            | -3.48                                                                                                                                                                                                                                                                                                                                                                                                                                                                                                                                                                                                                                                                                                                                                                                                                                                                                                                                                                                                                                                                                                                                                                                                                                                                                                                                                                               | 5.1595  |                 | -3.48  | [-13.59; 6.63]    | 0.7%           | 21.2%           |                |                 |                  |        |        |  |        |                  |       |       |                  |        |        |  |        |                  |       |       |           |        |         |  |        |                 |      |       |           |        |         |  |        |                  |      |       |                  |        |         |  |        |                   |      |       |                    |        |         |  |        |                  |        |       |                      |  |  |  |        |                  |        |        |                      |  |  |  |        |                |    |        |  |
| Tian 2018            | 4.91                                                                                                                                                                                                                                                                                                                                                                                                                                                                                                                                                                                                                                                                                                                                                                                                                                                                                                                                                                                                                                                                                                                                                                                                                                                                                                                                                                                | 7.2796  |                 | 4.91   | [-9.36; 19.18]    | 0.3%           | 18.3%           |                |                 |                  |        |        |  |        |                  |       |       |                  |        |        |  |        |                  |       |       |           |        |         |  |        |                 |      |       |           |        |         |  |        |                  |      |       |                  |        |         |  |        |                   |      |       |                    |        |         |  |        |                  |        |       |                      |  |  |  |        |                  |        |        |                      |  |  |  |        |                |    |        |  |
| Markopoulos 2005     | 10.00                                                                                                                                                                                                                                                                                                                                                                                                                                                                                                                                                                                                                                                                                                                                                                                                                                                                                                                                                                                                                                                                                                                                                                                                                                                                                                                                                                               | 6.8785  |                 | 10.00  | [-3.48; 23.48]    | 0.4%           | 18.9%           |                |                 |                  |        |        |  |        |                  |       |       |                  |        |        |  |        |                  |       |       |           |        |         |  |        |                 |      |       |           |        |         |  |        |                  |      |       |                  |        |         |  |        |                   |      |       |                    |        |         |  |        |                  |        |       |                      |  |  |  |        |                  |        |        |                      |  |  |  |        |                |    |        |  |
| Fixed effect model   |                                                                                                                                                                                                                                                                                                                                                                                                                                                                                                                                                                                                                                                                                                                                                                                                                                                                                                                                                                                                                                                                                                                                                                                                                                                                                                                                                                                     |         |                 | 19.81  | [ 18.97; 20.65]   | 100.0%         | --              |                |                 |                  |        |        |  |        |                  |       |       |                  |        |        |  |        |                  |       |       |           |        |         |  |        |                 |      |       |           |        |         |  |        |                  |      |       |                  |        |         |  |        |                   |      |       |                    |        |         |  |        |                  |        |       |                      |  |  |  |        |                  |        |        |                      |  |  |  |        |                |    |        |  |
| Random effects model |                                                                                                                                                                                                                                                                                                                                                                                                                                                                                                                                                                                                                                                                                                                                                                                                                                                                                                                                                                                                                                                                                                                                                                                                                                                                                                                                                                                     |         |                 | 8.05   | [ -3.68; 19.79]   | --             | 100.0%          |                |                 |                  |        |        |  |        |                  |       |       |                  |        |        |  |        |                  |       |       |           |        |         |  |        |                 |      |       |           |        |         |  |        |                  |      |       |                  |        |         |  |        |                   |      |       |                    |        |         |  |        |                  |        |       |                      |  |  |  |        |                  |        |        |                      |  |  |  |        |                |    |        |  |
| TG 6-mo              | <table><tr><th>Study</th><th>TE</th><th>seTE</th><th>Mean Difference</th><th>MD</th><th>95%-CI</th><th>Weight (fixed)</th><th>Weight (random)</th></tr><tr><td>Atalay 2004</td><td>-18.60</td><td>6.0189</td><td></td><td>-18.60</td><td>[-30.40; -6.80]</td><td>0.8%</td><td>22.3%</td></tr><tr><td>Markopoulos 2009</td><td>-24.10</td><td>0.5370</td><td></td><td>-24.10</td><td>[-25.15; -23.05]</td><td>98.5%</td><td>26.2%</td></tr><tr><td>Tian 2018</td><td>26.74</td><td>10.3811</td><td></td><td>26.74</td><td>[ 6.39; 47.09]</td><td>0.3%</td><td>17.2%</td></tr><tr><td>Tian 2018</td><td>-23.73</td><td>35.1822</td><td></td><td>-23.73</td><td>[-92.69; 45.23]</td><td>0.0%</td><td>3.7%</td></tr><tr><td>Tian 2018</td><td>-31.61</td><td>12.2718</td><td></td><td>-31.61</td><td>[-55.66; -7.56]</td><td>0.2%</td><td>15.2%</td></tr><tr><td>Markopoulos 2005</td><td>-13.50</td><td>12.0861</td><td></td><td>-13.50</td><td>[-37.19; 10.19]</td><td>0.2%</td><td>15.3%</td></tr><tr><td>Fixed effect model</td><td></td><td></td><td></td><td>-23.92</td><td>[-24.96; -22.87]</td><td>100.0%</td><td>--</td></tr><tr><td>Random effects model</td><td></td><td></td><td></td><td>-13.61</td><td>[-28.01; 0.79]</td><td>--</td><td>100.0%</td></tr></table> <p>Heterogeneity: <math>I^2 = 81\%</math>, <math>\tau^2 = 205.6795</math>, <math>p &lt; 0.01</math></p> | Study   | TE              | seTE   | Mean Difference   | MD             | 95%-CI          | Weight (fixed) | Weight (random) | Atalay 2004      | -18.60 | 6.0189 |  | -18.60 | [-30.40; -6.80]  | 0.8%  | 22.3% | Markopoulos 2009 | -24.10 | 0.5370 |  | -24.10 | [-25.15; -23.05] | 98.5% | 26.2% | Tian 2018 | 26.74  | 10.3811 |  | 26.74  | [ 6.39; 47.09]  | 0.3% | 17.2% | Tian 2018 | -23.73 | 35.1822 |  | -23.73 | [-92.69; 45.23]  | 0.0% | 3.7%  | Tian 2018        | -31.61 | 12.2718 |  | -31.61 | [-55.66; -7.56]   | 0.2% | 15.2% | Markopoulos 2005   | -13.50 | 12.0861 |  | -13.50 | [-37.19; 10.19]  | 0.2%   | 15.3% | Fixed effect model   |  |  |  | -23.92 | [-24.96; -22.87] | 100.0% | --     | Random effects model |  |  |  | -13.61 | [-28.01; 0.79] | -- | 100.0% |  |
| Study                | TE                                                                                                                                                                                                                                                                                                                                                                                                                                                                                                                                                                                                                                                                                                                                                                                                                                                                                                                                                                                                                                                                                                                                                                                                                                                                                                                                                                                  | seTE    | Mean Difference | MD     | 95%-CI            | Weight (fixed) | Weight (random) |                |                 |                  |        |        |  |        |                  |       |       |                  |        |        |  |        |                  |       |       |           |        |         |  |        |                 |      |       |           |        |         |  |        |                  |      |       |                  |        |         |  |        |                   |      |       |                    |        |         |  |        |                  |        |       |                      |  |  |  |        |                  |        |        |                      |  |  |  |        |                |    |        |  |
| Atalay 2004          | -18.60                                                                                                                                                                                                                                                                                                                                                                                                                                                                                                                                                                                                                                                                                                                                                                                                                                                                                                                                                                                                                                                                                                                                                                                                                                                                                                                                                                              | 6.0189  |                 | -18.60 | [-30.40; -6.80]   | 0.8%           | 22.3%           |                |                 |                  |        |        |  |        |                  |       |       |                  |        |        |  |        |                  |       |       |           |        |         |  |        |                 |      |       |           |        |         |  |        |                  |      |       |                  |        |         |  |        |                   |      |       |                    |        |         |  |        |                  |        |       |                      |  |  |  |        |                  |        |        |                      |  |  |  |        |                |    |        |  |
| Markopoulos 2009     | -24.10                                                                                                                                                                                                                                                                                                                                                                                                                                                                                                                                                                                                                                                                                                                                                                                                                                                                                                                                                                                                                                                                                                                                                                                                                                                                                                                                                                              | 0.5370  |                 | -24.10 | [-25.15; -23.05]  | 98.5%          | 26.2%           |                |                 |                  |        |        |  |        |                  |       |       |                  |        |        |  |        |                  |       |       |           |        |         |  |        |                 |      |       |           |        |         |  |        |                  |      |       |                  |        |         |  |        |                   |      |       |                    |        |         |  |        |                  |        |       |                      |  |  |  |        |                  |        |        |                      |  |  |  |        |                |    |        |  |
| Tian 2018            | 26.74                                                                                                                                                                                                                                                                                                                                                                                                                                                                                                                                                                                                                                                                                                                                                                                                                                                                                                                                                                                                                                                                                                                                                                                                                                                                                                                                                                               | 10.3811 |                 | 26.74  | [ 6.39; 47.09]    | 0.3%           | 17.2%           |                |                 |                  |        |        |  |        |                  |       |       |                  |        |        |  |        |                  |       |       |           |        |         |  |        |                 |      |       |           |        |         |  |        |                  |      |       |                  |        |         |  |        |                   |      |       |                    |        |         |  |        |                  |        |       |                      |  |  |  |        |                  |        |        |                      |  |  |  |        |                |    |        |  |
| Tian 2018            | -23.73                                                                                                                                                                                                                                                                                                                                                                                                                                                                                                                                                                                                                                                                                                                                                                                                                                                                                                                                                                                                                                                                                                                                                                                                                                                                                                                                                                              | 35.1822 |                 | -23.73 | [-92.69; 45.23]   | 0.0%           | 3.7%            |                |                 |                  |        |        |  |        |                  |       |       |                  |        |        |  |        |                  |       |       |           |        |         |  |        |                 |      |       |           |        |         |  |        |                  |      |       |                  |        |         |  |        |                   |      |       |                    |        |         |  |        |                  |        |       |                      |  |  |  |        |                  |        |        |                      |  |  |  |        |                |    |        |  |
| Tian 2018            | -31.61                                                                                                                                                                                                                                                                                                                                                                                                                                                                                                                                                                                                                                                                                                                                                                                                                                                                                                                                                                                                                                                                                                                                                                                                                                                                                                                                                                              | 12.2718 |                 | -31.61 | [-55.66; -7.56]   | 0.2%           | 15.2%           |                |                 |                  |        |        |  |        |                  |       |       |                  |        |        |  |        |                  |       |       |           |        |         |  |        |                 |      |       |           |        |         |  |        |                  |      |       |                  |        |         |  |        |                   |      |       |                    |        |         |  |        |                  |        |       |                      |  |  |  |        |                  |        |        |                      |  |  |  |        |                |    |        |  |
| Markopoulos 2005     | -13.50                                                                                                                                                                                                                                                                                                                                                                                                                                                                                                                                                                                                                                                                                                                                                                                                                                                                                                                                                                                                                                                                                                                                                                                                                                                                                                                                                                              | 12.0861 |                 | -13.50 | [-37.19; 10.19]   | 0.2%           | 15.3%           |                |                 |                  |        |        |  |        |                  |       |       |                  |        |        |  |        |                  |       |       |           |        |         |  |        |                 |      |       |           |        |         |  |        |                  |      |       |                  |        |         |  |        |                   |      |       |                    |        |         |  |        |                  |        |       |                      |  |  |  |        |                  |        |        |                      |  |  |  |        |                |    |        |  |
| Fixed effect model   |                                                                                                                                                                                                                                                                                                                                                                                                                                                                                                                                                                                                                                                                                                                                                                                                                                                                                                                                                                                                                                                                                                                                                                                                                                                                                                                                                                                     |         |                 | -23.92 | [-24.96; -22.87]  | 100.0%         | --              |                |                 |                  |        |        |  |        |                  |       |       |                  |        |        |  |        |                  |       |       |           |        |         |  |        |                 |      |       |           |        |         |  |        |                  |      |       |                  |        |         |  |        |                   |      |       |                    |        |         |  |        |                  |        |       |                      |  |  |  |        |                  |        |        |                      |  |  |  |        |                |    |        |  |
| Random effects model |                                                                                                                                                                                                                                                                                                                                                                                                                                                                                                                                                                                                                                                                                                                                                                                                                                                                                                                                                                                                                                                                                                                                                                                                                                                                                                                                                                                     |         |                 | -13.61 | [-28.01; 0.79]    | --             | 100.0%          |                |                 |                  |        |        |  |        |                  |       |       |                  |        |        |  |        |                  |       |       |           |        |         |  |        |                 |      |       |           |        |         |  |        |                  |      |       |                  |        |         |  |        |                   |      |       |                    |        |         |  |        |                  |        |       |                      |  |  |  |        |                  |        |        |                      |  |  |  |        |                |    |        |  |
| TG 12-mo             | <table><tr><th>Study</th><th>TE</th><th>seTE</th><th>Mean Difference</th><th>MD</th><th>95%-CI</th><th>Weight (fixed)</th><th>Weight (random)</th></tr><tr><td>Markopoulos 2009</td><td>-32.20</td><td>0.5232</td><td></td><td>-32.20</td><td>[-33.23; -31.17]</td><td>99.4%</td><td>43.6%</td></tr><tr><td>Tian 2018</td><td>-5.05</td><td>7.4871</td><td></td><td>-5.05</td><td>[-19.72; 9.62]</td><td>0.5%</td><td>35.5%</td></tr><tr><td>Tian 2018</td><td>-14.08</td><td>20.8750</td><td></td><td>-14.08</td><td>[-54.99; 26.83]</td><td>0.1%</td><td>15.7%</td></tr><tr><td>Tian 2018</td><td>-36.48</td><td>54.0853</td><td></td><td>-36.48</td><td>[-142.49; 69.53]</td><td>0.0%</td><td>3.4%</td></tr><tr><td>Markopoulos 2005</td><td>4.00</td><td>75.9539</td><td></td><td>4.00</td><td>[-144.87; 152.87]</td><td>0.0%</td><td>1.8%</td></tr><tr><td>Fixed effect model</td><td></td><td></td><td></td><td>-32.06</td><td>[-33.08; -31.03]</td><td>100.0%</td><td>--</td></tr><tr><td>Random effects model</td><td></td><td></td><td></td><td>-19.21</td><td>[-39.47; 1.05]</td><td>--</td><td>100.0%</td></tr></table> <p>Heterogeneity: <math>I^2 = 72\%</math>, <math>\tau^2 = 244.7985</math>, <math>p &lt; 0.01</math></p>                                                                                                                                          | Study   | TE              | seTE   | Mean Difference   | MD             | 95%-CI          | Weight (fixed) | Weight (random) | Markopoulos 2009 | -32.20 | 0.5232 |  | -32.20 | [-33.23; -31.17] | 99.4% | 43.6% | Tian 2018        | -5.05  | 7.4871 |  | -5.05  | [-19.72; 9.62]   | 0.5%  | 35.5% | Tian 2018 | -14.08 | 20.8750 |  | -14.08 | [-54.99; 26.83] | 0.1% | 15.7% | Tian 2018 | -36.48 | 54.0853 |  | -36.48 | [-142.49; 69.53] | 0.0% | 3.4%  | Markopoulos 2005 | 4.00   | 75.9539 |  | 4.00   | [-144.87; 152.87] | 0.0% | 1.8%  | Fixed effect model |        |         |  | -32.06 | [-33.08; -31.03] | 100.0% | --    | Random effects model |  |  |  | -19.21 | [-39.47; 1.05]   | --     | 100.0% |                      |  |  |  |        |                |    |        |  |
| Study                | TE                                                                                                                                                                                                                                                                                                                                                                                                                                                                                                                                                                                                                                                                                                                                                                                                                                                                                                                                                                                                                                                                                                                                                                                                                                                                                                                                                                                  | seTE    | Mean Difference | MD     | 95%-CI            | Weight (fixed) | Weight (random) |                |                 |                  |        |        |  |        |                  |       |       |                  |        |        |  |        |                  |       |       |           |        |         |  |        |                 |      |       |           |        |         |  |        |                  |      |       |                  |        |         |  |        |                   |      |       |                    |        |         |  |        |                  |        |       |                      |  |  |  |        |                  |        |        |                      |  |  |  |        |                |    |        |  |
| Markopoulos 2009     | -32.20                                                                                                                                                                                                                                                                                                                                                                                                                                                                                                                                                                                                                                                                                                                                                                                                                                                                                                                                                                                                                                                                                                                                                                                                                                                                                                                                                                              | 0.5232  |                 | -32.20 | [-33.23; -31.17]  | 99.4%          | 43.6%           |                |                 |                  |        |        |  |        |                  |       |       |                  |        |        |  |        |                  |       |       |           |        |         |  |        |                 |      |       |           |        |         |  |        |                  |      |       |                  |        |         |  |        |                   |      |       |                    |        |         |  |        |                  |        |       |                      |  |  |  |        |                  |        |        |                      |  |  |  |        |                |    |        |  |
| Tian 2018            | -5.05                                                                                                                                                                                                                                                                                                                                                                                                                                                                                                                                                                                                                                                                                                                                                                                                                                                                                                                                                                                                                                                                                                                                                                                                                                                                                                                                                                               | 7.4871  |                 | -5.05  | [-19.72; 9.62]    | 0.5%           | 35.5%           |                |                 |                  |        |        |  |        |                  |       |       |                  |        |        |  |        |                  |       |       |           |        |         |  |        |                 |      |       |           |        |         |  |        |                  |      |       |                  |        |         |  |        |                   |      |       |                    |        |         |  |        |                  |        |       |                      |  |  |  |        |                  |        |        |                      |  |  |  |        |                |    |        |  |
| Tian 2018            | -14.08                                                                                                                                                                                                                                                                                                                                                                                                                                                                                                                                                                                                                                                                                                                                                                                                                                                                                                                                                                                                                                                                                                                                                                                                                                                                                                                                                                              | 20.8750 |                 | -14.08 | [-54.99; 26.83]   | 0.1%           | 15.7%           |                |                 |                  |        |        |  |        |                  |       |       |                  |        |        |  |        |                  |       |       |           |        |         |  |        |                 |      |       |           |        |         |  |        |                  |      |       |                  |        |         |  |        |                   |      |       |                    |        |         |  |        |                  |        |       |                      |  |  |  |        |                  |        |        |                      |  |  |  |        |                |    |        |  |
| Tian 2018            | -36.48                                                                                                                                                                                                                                                                                                                                                                                                                                                                                                                                                                                                                                                                                                                                                                                                                                                                                                                                                                                                                                                                                                                                                                                                                                                                                                                                                                              | 54.0853 |                 | -36.48 | [-142.49; 69.53]  | 0.0%           | 3.4%            |                |                 |                  |        |        |  |        |                  |       |       |                  |        |        |  |        |                  |       |       |           |        |         |  |        |                 |      |       |           |        |         |  |        |                  |      |       |                  |        |         |  |        |                   |      |       |                    |        |         |  |        |                  |        |       |                      |  |  |  |        |                  |        |        |                      |  |  |  |        |                |    |        |  |
| Markopoulos 2005     | 4.00                                                                                                                                                                                                                                                                                                                                                                                                                                                                                                                                                                                                                                                                                                                                                                                                                                                                                                                                                                                                                                                                                                                                                                                                                                                                                                                                                                                | 75.9539 |                 | 4.00   | [-144.87; 152.87] | 0.0%           | 1.8%            |                |                 |                  |        |        |  |        |                  |       |       |                  |        |        |  |        |                  |       |       |           |        |         |  |        |                 |      |       |           |        |         |  |        |                  |      |       |                  |        |         |  |        |                   |      |       |                    |        |         |  |        |                  |        |       |                      |  |  |  |        |                  |        |        |                      |  |  |  |        |                |    |        |  |
| Fixed effect model   |                                                                                                                                                                                                                                                                                                                                                                                                                                                                                                                                                                                                                                                                                                                                                                                                                                                                                                                                                                                                                                                                                                                                                                                                                                                                                                                                                                                     |         |                 | -32.06 | [-33.08; -31.03]  | 100.0%         | --              |                |                 |                  |        |        |  |        |                  |       |       |                  |        |        |  |        |                  |       |       |           |        |         |  |        |                 |      |       |           |        |         |  |        |                  |      |       |                  |        |         |  |        |                   |      |       |                    |        |         |  |        |                  |        |       |                      |  |  |  |        |                  |        |        |                      |  |  |  |        |                |    |        |  |
| Random effects model |                                                                                                                                                                                                                                                                                                                                                                                                                                                                                                                                                                                                                                                                                                                                                                                                                                                                                                                                                                                                                                                                                                                                                                                                                                                                                                                                                                                     |         |                 | -19.21 | [-39.47; 1.05]    | --             | 100.0%          |                |                 |                  |        |        |  |        |                  |       |       |                  |        |        |  |        |                  |       |       |           |        |         |  |        |                 |      |       |           |        |         |  |        |                  |      |       |                  |        |         |  |        |                   |      |       |                    |        |         |  |        |                  |        |       |                      |  |  |  |        |                  |        |        |                      |  |  |  |        |                |    |        |  |

| T. chol 6-mo              | <table><thead><tr><th>Study</th><th>TE</th><th>seTE</th><th>Mean Difference</th><th>MD</th><th>95%-CI</th><th>Weight (fixed)</th><th>Weight (random)</th></tr></thead><tbody><tr><td>Atalay 2004</td><td>-6.96</td><td>14.0377</td><td></td><td>-6.96</td><td>[-34.47; 20.55]</td><td>0.1%</td><td>5.5%</td></tr><tr><td>Markopoulos 2009</td><td>11.50</td><td>0.3855</td><td></td><td>11.50</td><td>[10.74; 12.26]</td><td>96.5%</td><td>26.5%</td></tr><tr><td>Tian 2018</td><td>7.66</td><td>11.3567</td><td></td><td>7.66</td><td>[-14.60; 29.92]</td><td>0.1%</td><td>7.6%</td></tr><tr><td>Tian 2018</td><td>-1.86</td><td>2.7576</td><td></td><td>-1.86</td><td>[-7.26; 3.54]</td><td>1.9%</td><td>23.1%</td></tr><tr><td>Tian 2018</td><td>2.71</td><td>4.0179</td><td></td><td>2.71</td><td>[-5.16; 10.58]</td><td>0.9%</td><td>20.2%</td></tr><tr><td>Markopoulos 2005</td><td>10.50</td><td>5.2862</td><td></td><td>10.50</td><td>[0.14; 20.86]</td><td>0.5%</td><td>17.2%</td></tr><tr><td>Fixed effect model</td><td></td><td></td><td></td><td>11.15</td><td>[10.40; 11.89]</td><td>100.0%</td><td>--</td></tr><tr><td>Random effects model</td><td></td><td></td><td></td><td>5.16</td><td>[-2.07; 12.40]</td><td>--</td><td>100.0%</td></tr></tbody></table> <p>Heterogeneity: <math>I^2 = 83\%</math>, <math>\tau^2 = 51.3634</math>, <math>p &lt; 0.01</math></p> | Study   | TE              | seTE  | Mean Difference | MD             | 95%-CI          | Weight (fixed) | Weight (random) | Atalay 2004      | -6.96           | 14.0377    |                | -6.96           | [-34.47; 20.55] | 0.1%        | 5.5%  | Markopoulos 2009 | 11.50  | 0.3855  |      | 11.50  | [10.74; 12.26]  | 96.5%          | 26.5% | Tian 2018 | 7.66             | 11.3567 |       | 7.66   | [-14.60; 29.92] | 0.1%  | 7.6%   | Tian 2018 | -1.86        | 2.7576 |       | -1.86              | [-7.26; 3.54] | 1.9% | 23.1% | Tian 2018        | 2.71 | 4.0179 |      | 2.71         | [-5.16; 10.58] | 0.9%  | 20.2%                | Markopoulos 2005   | 10.50 | 5.2862 |  | 10.50 | [0.14; 20.86] | 0.5%   | 17.2%          | Fixed effect model   |        |                                                                                     |                                                                                       | 11.15 | [10.40; 11.89] | 100.0% | --     | Random effects model                                                               |                                                                                      |  |  | 5.16 | [-2.07; 12.40] | -- | 100.0% | 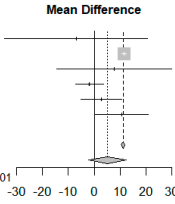 |  |
|---------------------------|--------------------------------------------------------------------------------------------------------------------------------------------------------------------------------------------------------------------------------------------------------------------------------------------------------------------------------------------------------------------------------------------------------------------------------------------------------------------------------------------------------------------------------------------------------------------------------------------------------------------------------------------------------------------------------------------------------------------------------------------------------------------------------------------------------------------------------------------------------------------------------------------------------------------------------------------------------------------------------------------------------------------------------------------------------------------------------------------------------------------------------------------------------------------------------------------------------------------------------------------------------------------------------------------------------------------------------------------------------------------------------------|---------|-----------------|-------|-----------------|----------------|-----------------|----------------|-----------------|------------------|-----------------|------------|----------------|-----------------|-----------------|-------------|-------|------------------|--------|---------|------|--------|-----------------|----------------|-------|-----------|------------------|---------|-------|--------|-----------------|-------|--------|-----------|--------------|--------|-------|--------------------|---------------|------|-------|------------------|------|--------|------|--------------|----------------|-------|----------------------|--------------------|-------|--------|--|-------|---------------|--------|----------------|----------------------|--------|-------------------------------------------------------------------------------------|---------------------------------------------------------------------------------------|-------|----------------|--------|--------|------------------------------------------------------------------------------------|--------------------------------------------------------------------------------------|--|--|------|----------------|----|--------|-----------------------------------------------------------------------------------|-------------------------------------------------------------------------------------|
| Study                     | TE                                                                                                                                                                                                                                                                                                                                                                                                                                                                                                                                                                                                                                                                                                                                                                                                                                                                                                                                                                                                                                                                                                                                                                                                                                                                                                                                                                                   | seTE    | Mean Difference | MD    | 95%-CI          | Weight (fixed) | Weight (random) |                |                 |                  |                 |            |                |                 |                 |             |       |                  |        |         |      |        |                 |                |       |           |                  |         |       |        |                 |       |        |           |              |        |       |                    |               |      |       |                  |      |        |      |              |                |       |                      |                    |       |        |  |       |               |        |                |                      |        |                                                                                     |                                                                                       |       |                |        |        |                                                                                    |                                                                                      |  |  |      |                |    |        |                                                                                   |                                                                                     |
| Atalay 2004               | -6.96                                                                                                                                                                                                                                                                                                                                                                                                                                                                                                                                                                                                                                                                                                                                                                                                                                                                                                                                                                                                                                                                                                                                                                                                                                                                                                                                                                                | 14.0377 |                 | -6.96 | [-34.47; 20.55] | 0.1%           | 5.5%            |                |                 |                  |                 |            |                |                 |                 |             |       |                  |        |         |      |        |                 |                |       |           |                  |         |       |        |                 |       |        |           |              |        |       |                    |               |      |       |                  |      |        |      |              |                |       |                      |                    |       |        |  |       |               |        |                |                      |        |                                                                                     |                                                                                       |       |                |        |        |                                                                                    |                                                                                      |  |  |      |                |    |        |                                                                                   |                                                                                     |
| Markopoulos 2009          | 11.50                                                                                                                                                                                                                                                                                                                                                                                                                                                                                                                                                                                                                                                                                                                                                                                                                                                                                                                                                                                                                                                                                                                                                                                                                                                                                                                                                                                | 0.3855  |                 | 11.50 | [10.74; 12.26]  | 96.5%          | 26.5%           |                |                 |                  |                 |            |                |                 |                 |             |       |                  |        |         |      |        |                 |                |       |           |                  |         |       |        |                 |       |        |           |              |        |       |                    |               |      |       |                  |      |        |      |              |                |       |                      |                    |       |        |  |       |               |        |                |                      |        |                                                                                     |                                                                                       |       |                |        |        |                                                                                    |                                                                                      |  |  |      |                |    |        |                                                                                   |                                                                                     |
| Tian 2018                 | 7.66                                                                                                                                                                                                                                                                                                                                                                                                                                                                                                                                                                                                                                                                                                                                                                                                                                                                                                                                                                                                                                                                                                                                                                                                                                                                                                                                                                                 | 11.3567 |                 | 7.66  | [-14.60; 29.92] | 0.1%           | 7.6%            |                |                 |                  |                 |            |                |                 |                 |             |       |                  |        |         |      |        |                 |                |       |           |                  |         |       |        |                 |       |        |           |              |        |       |                    |               |      |       |                  |      |        |      |              |                |       |                      |                    |       |        |  |       |               |        |                |                      |        |                                                                                     |                                                                                       |       |                |        |        |                                                                                    |                                                                                      |  |  |      |                |    |        |                                                                                   |                                                                                     |
| Tian 2018                 | -1.86                                                                                                                                                                                                                                                                                                                                                                                                                                                                                                                                                                                                                                                                                                                                                                                                                                                                                                                                                                                                                                                                                                                                                                                                                                                                                                                                                                                | 2.7576  |                 | -1.86 | [-7.26; 3.54]   | 1.9%           | 23.1%           |                |                 |                  |                 |            |                |                 |                 |             |       |                  |        |         |      |        |                 |                |       |           |                  |         |       |        |                 |       |        |           |              |        |       |                    |               |      |       |                  |      |        |      |              |                |       |                      |                    |       |        |  |       |               |        |                |                      |        |                                                                                     |                                                                                       |       |                |        |        |                                                                                    |                                                                                      |  |  |      |                |    |        |                                                                                   |                                                                                     |
| Tian 2018                 | 2.71                                                                                                                                                                                                                                                                                                                                                                                                                                                                                                                                                                                                                                                                                                                                                                                                                                                                                                                                                                                                                                                                                                                                                                                                                                                                                                                                                                                 | 4.0179  |                 | 2.71  | [-5.16; 10.58]  | 0.9%           | 20.2%           |                |                 |                  |                 |            |                |                 |                 |             |       |                  |        |         |      |        |                 |                |       |           |                  |         |       |        |                 |       |        |           |              |        |       |                    |               |      |       |                  |      |        |      |              |                |       |                      |                    |       |        |  |       |               |        |                |                      |        |                                                                                     |                                                                                       |       |                |        |        |                                                                                    |                                                                                      |  |  |      |                |    |        |                                                                                   |                                                                                     |
| Markopoulos 2005          | 10.50                                                                                                                                                                                                                                                                                                                                                                                                                                                                                                                                                                                                                                                                                                                                                                                                                                                                                                                                                                                                                                                                                                                                                                                                                                                                                                                                                                                | 5.2862  |                 | 10.50 | [0.14; 20.86]   | 0.5%           | 17.2%           |                |                 |                  |                 |            |                |                 |                 |             |       |                  |        |         |      |        |                 |                |       |           |                  |         |       |        |                 |       |        |           |              |        |       |                    |               |      |       |                  |      |        |      |              |                |       |                      |                    |       |        |  |       |               |        |                |                      |        |                                                                                     |                                                                                       |       |                |        |        |                                                                                    |                                                                                      |  |  |      |                |    |        |                                                                                   |                                                                                     |
| Fixed effect model        |                                                                                                                                                                                                                                                                                                                                                                                                                                                                                                                                                                                                                                                                                                                                                                                                                                                                                                                                                                                                                                                                                                                                                                                                                                                                                                                                                                                      |         |                 | 11.15 | [10.40; 11.89]  | 100.0%         | --              |                |                 |                  |                 |            |                |                 |                 |             |       |                  |        |         |      |        |                 |                |       |           |                  |         |       |        |                 |       |        |           |              |        |       |                    |               |      |       |                  |      |        |      |              |                |       |                      |                    |       |        |  |       |               |        |                |                      |        |                                                                                     |                                                                                       |       |                |        |        |                                                                                    |                                                                                      |  |  |      |                |    |        |                                                                                   |                                                                                     |
| Random effects model      |                                                                                                                                                                                                                                                                                                                                                                                                                                                                                                                                                                                                                                                                                                                                                                                                                                                                                                                                                                                                                                                                                                                                                                                                                                                                                                                                                                                      |         |                 | 5.16  | [-2.07; 12.40]  | --             | 100.0%          |                |                 |                  |                 |            |                |                 |                 |             |       |                  |        |         |      |        |                 |                |       |           |                  |         |       |        |                 |       |        |           |              |        |       |                    |               |      |       |                  |      |        |      |              |                |       |                      |                    |       |        |  |       |               |        |                |                      |        |                                                                                     |                                                                                       |       |                |        |        |                                                                                    |                                                                                      |  |  |      |                |    |        |                                                                                   |                                                                                     |
| T. chol 12-mo             | <table><thead><tr><th>Study</th><th>TE</th><th>seTE</th><th>Mean Difference</th><th>MD</th><th>95%-CI</th><th>Weight (fixed)</th><th>Weight (random)</th></tr></thead><tbody><tr><td>Markopoulos 2009</td><td>14.40</td><td>0.3442</td><td></td><td>14.40</td><td>[13.73; 15.07]</td><td>52.6%</td><td>23.5%</td></tr><tr><td>Tian 2018</td><td>7.85</td><td>11.6384</td><td></td><td>7.85</td><td>[-14.96; 30.66]</td><td>0.0%</td><td>8.9%</td></tr><tr><td>Tian 2018</td><td>2.17</td><td>3.2172</td><td></td><td>2.17</td><td>[-4.14; 8.48]</td><td>0.6%</td><td>20.9%</td></tr><tr><td>Tian 2018</td><td>-0.62</td><td>0.9192</td><td></td><td>-0.62</td><td>[-2.42; 1.18]</td><td>7.4%</td><td>23.3%</td></tr><tr><td>Markopoulos 2005</td><td>1.00</td><td>0.3981</td><td></td><td>1.00</td><td>[0.22; 1.78]</td><td>39.3%</td><td>23.5%</td></tr><tr><td>Fixed effect model</td><td></td><td></td><td></td><td>7.94</td><td>[7.45; 8.43]</td><td>100.0%</td><td>--</td></tr><tr><td>Random effects model</td><td></td><td></td><td></td><td>4.62</td><td>[-4.00; 13.24]</td><td>--</td><td>100.0%</td></tr></tbody></table> <p>Heterogeneity: <math>I^2 = 99\%</math>, <math>\tau^2 = 82.2208</math>, <math>p &lt; 0.01</math></p>                                                                                                                                           | Study   | TE              | seTE  | Mean Difference | MD             | 95%-CI          | Weight (fixed) | Weight (random) | Markopoulos 2009 | 14.40           | 0.3442     |                | 14.40           | [13.73; 15.07]  | 52.6%       | 23.5% | Tian 2018        | 7.85   | 11.6384 |      | 7.85   | [-14.96; 30.66] | 0.0%           | 8.9%  | Tian 2018 | 2.17             | 3.2172  |       | 2.17   | [-4.14; 8.48]   | 0.6%  | 20.9%  | Tian 2018 | -0.62        | 0.9192 |       | -0.62              | [-2.42; 1.18] | 7.4% | 23.3% | Markopoulos 2005 | 1.00 | 0.3981 |      | 1.00         | [0.22; 1.78]   | 39.3% | 23.5%                | Fixed effect model |       |        |  | 7.94  | [7.45; 8.43]  | 100.0% | --             | Random effects model |        |                                                                                     |                                                                                       | 4.62  | [-4.00; 13.24] | --     | 100.0% |  |  |  |  |      |                |    |        |                                                                                   |                                                                                     |
| Study                     | TE                                                                                                                                                                                                                                                                                                                                                                                                                                                                                                                                                                                                                                                                                                                                                                                                                                                                                                                                                                                                                                                                                                                                                                                                                                                                                                                                                                                   | seTE    | Mean Difference | MD    | 95%-CI          | Weight (fixed) | Weight (random) |                |                 |                  |                 |            |                |                 |                 |             |       |                  |        |         |      |        |                 |                |       |           |                  |         |       |        |                 |       |        |           |              |        |       |                    |               |      |       |                  |      |        |      |              |                |       |                      |                    |       |        |  |       |               |        |                |                      |        |                                                                                     |                                                                                       |       |                |        |        |                                                                                    |                                                                                      |  |  |      |                |    |        |                                                                                   |                                                                                     |
| Markopoulos 2009          | 14.40                                                                                                                                                                                                                                                                                                                                                                                                                                                                                                                                                                                                                                                                                                                                                                                                                                                                                                                                                                                                                                                                                                                                                                                                                                                                                                                                                                                | 0.3442  |                 | 14.40 | [13.73; 15.07]  | 52.6%          | 23.5%           |                |                 |                  |                 |            |                |                 |                 |             |       |                  |        |         |      |        |                 |                |       |           |                  |         |       |        |                 |       |        |           |              |        |       |                    |               |      |       |                  |      |        |      |              |                |       |                      |                    |       |        |  |       |               |        |                |                      |        |                                                                                     |                                                                                       |       |                |        |        |                                                                                    |                                                                                      |  |  |      |                |    |        |                                                                                   |                                                                                     |
| Tian 2018                 | 7.85                                                                                                                                                                                                                                                                                                                                                                                                                                                                                                                                                                                                                                                                                                                                                                                                                                                                                                                                                                                                                                                                                                                                                                                                                                                                                                                                                                                 | 11.6384 |                 | 7.85  | [-14.96; 30.66] | 0.0%           | 8.9%            |                |                 |                  |                 |            |                |                 |                 |             |       |                  |        |         |      |        |                 |                |       |           |                  |         |       |        |                 |       |        |           |              |        |       |                    |               |      |       |                  |      |        |      |              |                |       |                      |                    |       |        |  |       |               |        |                |                      |        |                                                                                     |                                                                                       |       |                |        |        |                                                                                    |                                                                                      |  |  |      |                |    |        |                                                                                   |                                                                                     |
| Tian 2018                 | 2.17                                                                                                                                                                                                                                                                                                                                                                                                                                                                                                                                                                                                                                                                                                                                                                                                                                                                                                                                                                                                                                                                                                                                                                                                                                                                                                                                                                                 | 3.2172  |                 | 2.17  | [-4.14; 8.48]   | 0.6%           | 20.9%           |                |                 |                  |                 |            |                |                 |                 |             |       |                  |        |         |      |        |                 |                |       |           |                  |         |       |        |                 |       |        |           |              |        |       |                    |               |      |       |                  |      |        |      |              |                |       |                      |                    |       |        |  |       |               |        |                |                      |        |                                                                                     |                                                                                       |       |                |        |        |                                                                                    |                                                                                      |  |  |      |                |    |        |                                                                                   |                                                                                     |
| Tian 2018                 | -0.62                                                                                                                                                                                                                                                                                                                                                                                                                                                                                                                                                                                                                                                                                                                                                                                                                                                                                                                                                                                                                                                                                                                                                                                                                                                                                                                                                                                | 0.9192  |                 | -0.62 | [-2.42; 1.18]   | 7.4%           | 23.3%           |                |                 |                  |                 |            |                |                 |                 |             |       |                  |        |         |      |        |                 |                |       |           |                  |         |       |        |                 |       |        |           |              |        |       |                    |               |      |       |                  |      |        |      |              |                |       |                      |                    |       |        |  |       |               |        |                |                      |        |                                                                                     |                                                                                       |       |                |        |        |                                                                                    |                                                                                      |  |  |      |                |    |        |                                                                                   |                                                                                     |
| Markopoulos 2005          | 1.00                                                                                                                                                                                                                                                                                                                                                                                                                                                                                                                                                                                                                                                                                                                                                                                                                                                                                                                                                                                                                                                                                                                                                                                                                                                                                                                                                                                 | 0.3981  |                 | 1.00  | [0.22; 1.78]    | 39.3%          | 23.5%           |                |                 |                  |                 |            |                |                 |                 |             |       |                  |        |         |      |        |                 |                |       |           |                  |         |       |        |                 |       |        |           |              |        |       |                    |               |      |       |                  |      |        |      |              |                |       |                      |                    |       |        |  |       |               |        |                |                      |        |                                                                                     |                                                                                       |       |                |        |        |                                                                                    |                                                                                      |  |  |      |                |    |        |                                                                                   |                                                                                     |
| Fixed effect model        |                                                                                                                                                                                                                                                                                                                                                                                                                                                                                                                                                                                                                                                                                                                                                                                                                                                                                                                                                                                                                                                                                                                                                                                                                                                                                                                                                                                      |         |                 | 7.94  | [7.45; 8.43]    | 100.0%         | --              |                |                 |                  |                 |            |                |                 |                 |             |       |                  |        |         |      |        |                 |                |       |           |                  |         |       |        |                 |       |        |           |              |        |       |                    |               |      |       |                  |      |        |      |              |                |       |                      |                    |       |        |  |       |               |        |                |                      |        |                                                                                     |                                                                                       |       |                |        |        |                                                                                    |                                                                                      |  |  |      |                |    |        |                                                                                   |                                                                                     |
| Random effects model      |                                                                                                                                                                                                                                                                                                                                                                                                                                                                                                                                                                                                                                                                                                                                                                                                                                                                                                                                                                                                                                                                                                                                                                                                                                                                                                                                                                                      |         |                 | 4.62  | [-4.00; 13.24]  | --             | 100.0%          |                |                 |                  |                 |            |                |                 |                 |             |       |                  |        |         |      |        |                 |                |       |           |                  |         |       |        |                 |       |        |           |              |        |       |                    |               |      |       |                  |      |        |      |              |                |       |                      |                    |       |        |  |       |               |        |                |                      |        |                                                                                     |                                                                                       |       |                |        |        |                                                                                    |                                                                                      |  |  |      |                |    |        |                                                                                   |                                                                                     |
| Comparison with tamoxifen |                                                                                                                                                                                                                                                                                                                                                                                                                                                                                                                                                                                                                                                                                                                                                                                                                                                                                                                                                                                                                                                                                                                                                                                                                                                                                                                                                                                      |         |                 |       |                 |                |                 |                |                 |                  |                 |            |                |                 |                 |             |       |                  |        |         |      |        |                 |                |       |           |                  |         |       |        |                 |       |        |           |              |        |       |                    |               |      |       |                  |      |        |      |              |                |       |                      |                    |       |        |  |       |               |        |                |                      |        |                                                                                     |                                                                                       |       |                |        |        |                                                                                    |                                                                                      |  |  |      |                |    |        |                                                                                   |                                                                                     |
| HDL 6-mo                  | <table><thead><tr><th rowspan="2">Study</th><th colspan="2">Experimental</th><th colspan="2">Control</th><th rowspan="2">Mean Difference</th><th rowspan="2">MD</th><th rowspan="2">95%-CI</th><th rowspan="2">Weight (fixed)</th><th rowspan="2">Weight (random)</th></tr><tr><th>Total Mean</th><th>SD</th><th>Total Mean</th><th>SD</th></tr></thead><tbody><tr><td>Atalay 2004</td><td>36</td><td>-2.71</td><td>2.4540</td><td>36</td><td>5.41</td><td>4.5102</td><td>-8.12</td><td>[-9.80; -6.44]</td><td>3.1%</td><td>49.5%</td></tr><tr><td>Markopoulos 2005</td><td>90</td><td>-2.00</td><td>0.8454</td><td>86</td><td>-2.70</td><td>1.1414</td><td>0.70</td><td>[0.40; 1.00]</td><td>96.9%</td><td>50.5%</td></tr><tr><td>Fixed effect model</td><td>126</td><td></td><td></td><td>122</td><td></td><td></td><td>0.43</td><td>[0.14; 0.72]</td><td>100.0%</td><td>--</td></tr><tr><td>Random effects model</td><td></td><td></td><td></td><td></td><td></td><td></td><td>-3.67</td><td>[-12.31; 4.97]</td><td>--</td><td>100.0%</td></tr></tbody></table> <p>Heterogeneity: <math>I^2 = 99\%</math>, <math>\tau^2 = 38.5247</math>, <math>p &lt; 0.01</math></p>                                                                                                                                                                                                            | Study   | Experimental    |       | Control         |                | Mean Difference | MD             | 95%-CI          | Weight (fixed)   | Weight (random) | Total Mean | SD             | Total Mean      | SD              | Atalay 2004 | 36    | -2.71            | 2.4540 | 36      | 5.41 | 4.5102 | -8.12           | [-9.80; -6.44] | 3.1%  | 49.5%     | Markopoulos 2005 | 90      | -2.00 | 0.8454 | 86              | -2.70 | 1.1414 | 0.70      | [0.40; 1.00] | 96.9%  | 50.5% | Fixed effect model | 126           |      |       | 122              |      |        | 0.43 | [0.14; 0.72] | 100.0%         | --    | Random effects model |                    |       |        |  |       |               | -3.67  | [-12.31; 4.97] | --                   | 100.0% |  |  |       |                |        |        |                                                                                    |                                                                                      |  |  |      |                |    |        |                                                                                   |                                                                                     |
| Study                     | Experimental                                                                                                                                                                                                                                                                                                                                                                                                                                                                                                                                                                                                                                                                                                                                                                                                                                                                                                                                                                                                                                                                                                                                                                                                                                                                                                                                                                         |         | Control         |       | Mean Difference | MD             |                 |                |                 |                  |                 | 95%-CI     | Weight (fixed) | Weight (random) |                 |             |       |                  |        |         |      |        |                 |                |       |           |                  |         |       |        |                 |       |        |           |              |        |       |                    |               |      |       |                  |      |        |      |              |                |       |                      |                    |       |        |  |       |               |        |                |                      |        |                                                                                     |                                                                                       |       |                |        |        |                                                                                    |                                                                                      |  |  |      |                |    |        |                                                                                   |                                                                                     |
|                           | Total Mean                                                                                                                                                                                                                                                                                                                                                                                                                                                                                                                                                                                                                                                                                                                                                                                                                                                                                                                                                                                                                                                                                                                                                                                                                                                                                                                                                                           | SD      | Total Mean      | SD    |                 |                |                 |                |                 |                  |                 |            |                |                 |                 |             |       |                  |        |         |      |        |                 |                |       |           |                  |         |       |        |                 |       |        |           |              |        |       |                    |               |      |       |                  |      |        |      |              |                |       |                      |                    |       |        |  |       |               |        |                |                      |        |                                                                                     |                                                                                       |       |                |        |        |                                                                                    |                                                                                      |  |  |      |                |    |        |                                                                                   |                                                                                     |
| Atalay 2004               | 36                                                                                                                                                                                                                                                                                                                                                                                                                                                                                                                                                                                                                                                                                                                                                                                                                                                                                                                                                                                                                                                                                                                                                                                                                                                                                                                                                                                   | -2.71   | 2.4540          | 36    | 5.41            | 4.5102         | -8.12           | [-9.80; -6.44] | 3.1%            | 49.5%            |                 |            |                |                 |                 |             |       |                  |        |         |      |        |                 |                |       |           |                  |         |       |        |                 |       |        |           |              |        |       |                    |               |      |       |                  |      |        |      |              |                |       |                      |                    |       |        |  |       |               |        |                |                      |        |                                                                                     |                                                                                       |       |                |        |        |                                                                                    |                                                                                      |  |  |      |                |    |        |                                                                                   |                                                                                     |
| Markopoulos 2005          | 90                                                                                                                                                                                                                                                                                                                                                                                                                                                                                                                                                                                                                                                                                                                                                                                                                                                                                                                                                                                                                                                                                                                                                                                                                                                                                                                                                                                   | -2.00   | 0.8454          | 86    | -2.70           | 1.1414         | 0.70            | [0.40; 1.00]   | 96.9%           | 50.5%            |                 |            |                |                 |                 |             |       |                  |        |         |      |        |                 |                |       |           |                  |         |       |        |                 |       |        |           |              |        |       |                    |               |      |       |                  |      |        |      |              |                |       |                      |                    |       |        |  |       |               |        |                |                      |        |                                                                                     |                                                                                       |       |                |        |        |                                                                                    |                                                                                      |  |  |      |                |    |        |                                                                                   |                                                                                     |
| Fixed effect model        | 126                                                                                                                                                                                                                                                                                                                                                                                                                                                                                                                                                                                                                                                                                                                                                                                                                                                                                                                                                                                                                                                                                                                                                                                                                                                                                                                                                                                  |         |                 | 122   |                 |                | 0.43            | [0.14; 0.72]   | 100.0%          | --               |                 |            |                |                 |                 |             |       |                  |        |         |      |        |                 |                |       |           |                  |         |       |        |                 |       |        |           |              |        |       |                    |               |      |       |                  |      |        |      |              |                |       |                      |                    |       |        |  |       |               |        |                |                      |        |                                                                                     |                                                                                       |       |                |        |        |                                                                                    |                                                                                      |  |  |      |                |    |        |                                                                                   |                                                                                     |
| Random effects model      |                                                                                                                                                                                                                                                                                                                                                                                                                                                                                                                                                                                                                                                                                                                                                                                                                                                                                                                                                                                                                                                                                                                                                                                                                                                                                                                                                                                      |         |                 |       |                 |                | -3.67           | [-12.31; 4.97] | --              | 100.0%           |                 |            |                |                 |                 |             |       |                  |        |         |      |        |                 |                |       |           |                  |         |       |        |                 |       |        |           |              |        |       |                    |               |      |       |                  |      |        |      |              |                |       |                      |                    |       |        |  |       |               |        |                |                      |        |                                                                                     |                                                                                       |       |                |        |        |                                                                                    |                                                                                      |  |  |      |                |    |        |                                                                                   |                                                                                     |

HDL 12-mo

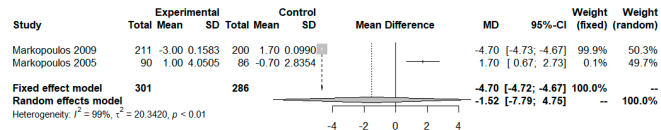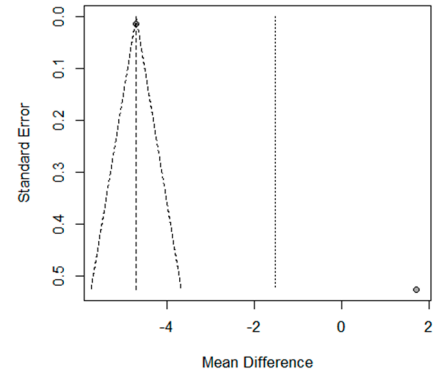

LDL 6-mo

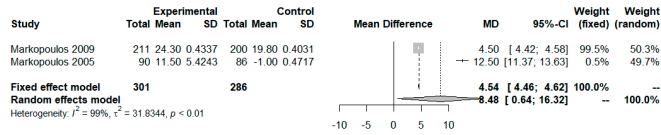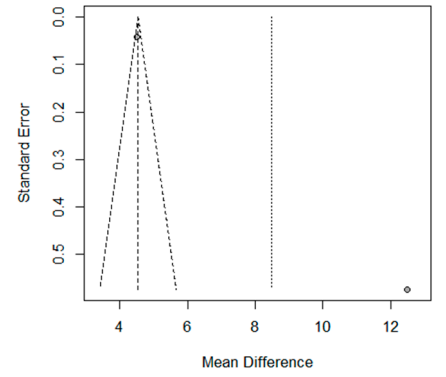

LDL 12-mo

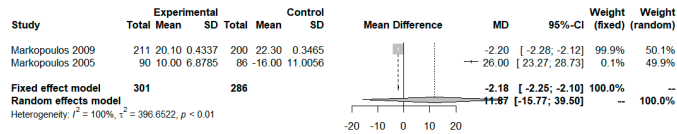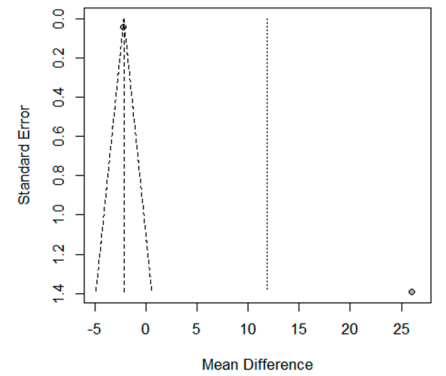

TG 6-mo

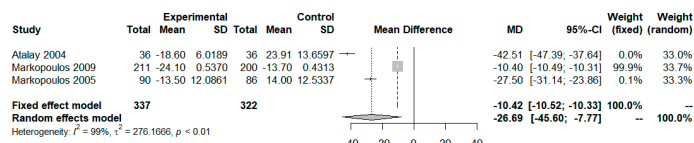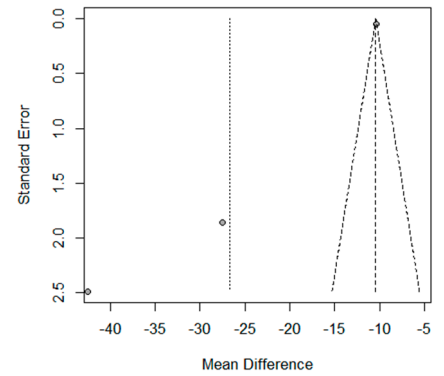

TG 12-mo

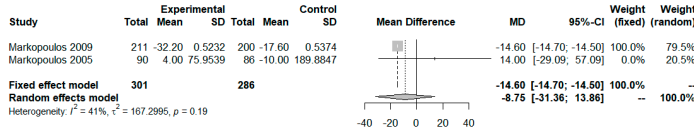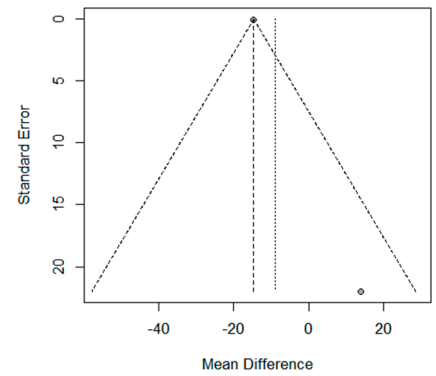

T. chol 6-mo

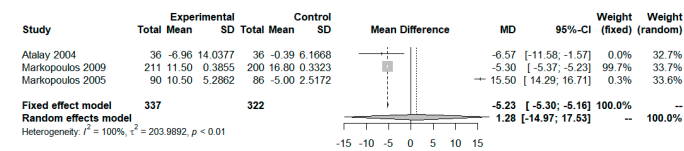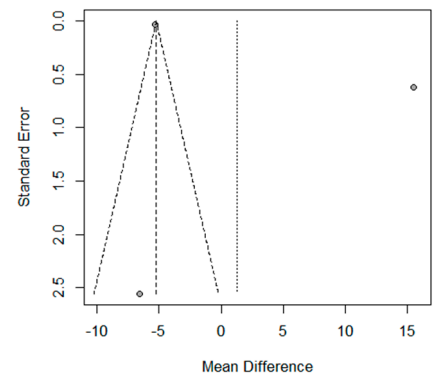

T. chol 12-mo

| Study                       | Experimental |       |        | Control    |        |        | Mean Difference | MD           | 95%-CI                 | Weight        |               |
|-----------------------------|--------------|-------|--------|------------|--------|--------|-----------------|--------------|------------------------|---------------|---------------|
|                             | Total        | Mean  | SD     | Total      | Mean   | SD     |                 |              |                        | (fixed)       | (random)      |
| Markopoulos 2009            | 211          | 14.40 | 0.3442 | 200        | 21.60  | 0.2899 |                 | -7.20        | [-7.26; -7.14]         | 99.9%         | 50.0%         |
| Markopoulos 2005            | 90           | 1.00  | 0.3981 | 86         | -20.00 | 7.9613 |                 | -21.00       | [19.32; 22.68]         | 0.1%          | 50.0%         |
| <b>Fixed effect model</b>   | <b>301</b>   |       |        | <b>286</b> |        |        |                 | <b>-7.16</b> | <b>[-7.22; -7.10]</b>  | <b>100.0%</b> | <b>--</b>     |
| <b>Random effects model</b> |              |       |        |            |        |        |                 | <b>-7.16</b> | <b>[-20.75; 34.52]</b> | <b>--</b>     | <b>100.0%</b> |

Heterogeneity:  $I^2 = 100\%$ ,  $\tau^2 = 397.2501$ ,  $p < 0.01$

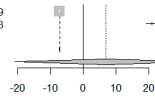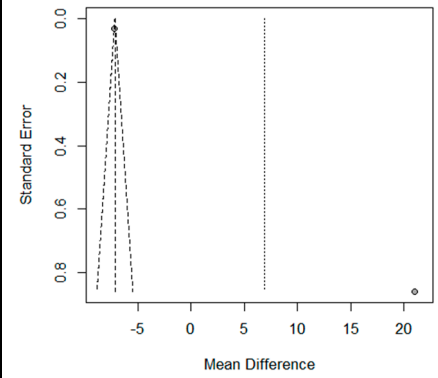

Supplement: s1 [file s1]
